# Supplementary material
Source: Royal Society of Chemistry journal article supplement (doi:10.1039/d6dt00477f)
Supplement: d6dt00477f1.pdf [file d6dt00477f1.pdf]

# **Iridium-based Metallo-organic Triangles as Efficient Singlet Oxygen Photosensitizers for Rhodamine B Photodegradation**

Xiaojie Huang,<sup>a†</sup> Yuxin Li,<sup>a†</sup> Min Wang,<sup>c</sup> Ning Wang,<sup>a</sup> Jun Wang,<sup>a</sup> Pingshan Wang,<sup>\*a,b</sup>  
Mingzhao Chen,<sup>\*a</sup> Zhilong Jiang<sup>\*a</sup>

## **Table of Contents**

|                                                                                                            |           |
|------------------------------------------------------------------------------------------------------------|-----------|
| <b>1. General Procedures .....</b>                                                                         | <b>2</b>  |
| <b>2. Synthesis of ligands and complexes.....</b>                                                          | <b>2</b>  |
| <b>3. <sup>1</sup>H NMR, <sup>13</sup>C NMR, 2D COSY and 2D NOESY spectra of ligands and complexes. ..</b> | <b>7</b>  |
| <b>4. ESI-MS spectra data of ligands and complexes.....</b>                                                | <b>17</b> |
| <b>5. Photocatalytic degradation of Rhodamine B .....</b>                                                  | <b>22</b> |
| <b>6. References.....</b>                                                                                  | <b>26</b> |

## 1. General Procedures

All starting materials were purchased from Aldrich, Alfa Aesar and used without further purification. Column chromatography was conducted by using basic  $\text{Al}_2\text{O}_3$  (sinopharm chemical reagents co., Ltd, 200-300 mesh) or  $\text{SiO}_2$  (Qingdao Haiyang Chemical co., Ltd, 200-300 mesh). The  $^1\text{H}$  NMR and  $^{13}\text{C}$  NMR spectra were recorded on a Bruker Avance 400-MHz and 500-MHz NMR spectrometer in  $\text{CDCl}_3$ , and  $\text{CD}_3\text{CN}$  with TMS as the inner standard.

**ESI.** ESI mass spectrometry and traveling wave ion mobility (TWIM) experiments were conducted on a Waters Synapt HDMS G2i instrument with a LockSpray ESI source, using the following parameters: ESI capillary voltage, 1.3-3.0 kV; sample cone voltage, 20-25 V; extraction cone voltage, 1.1-3 V; desolvation gas flow, 800 L/h ( $\text{N}_2$ ); trap collision energy (CE), 4 V; transfer CE, 0 V; trap gas flow, 2.0 mL/min (Ar); source temperature, 30 °C; and desolvation temperature, 30 °C. All samples were dissolved in  $\text{CH}_3\text{CN}$  or  $\text{CH}_3\text{CN}/\text{CH}_3\text{NO}_2$  (1:1, v/v) and then infused into the -100, KD Scientific). Data were collected and analyzed by using MassLynx 4.1 and DriftScope 2.4 (Waters).

## 2. Synthesis of ligands and complexes

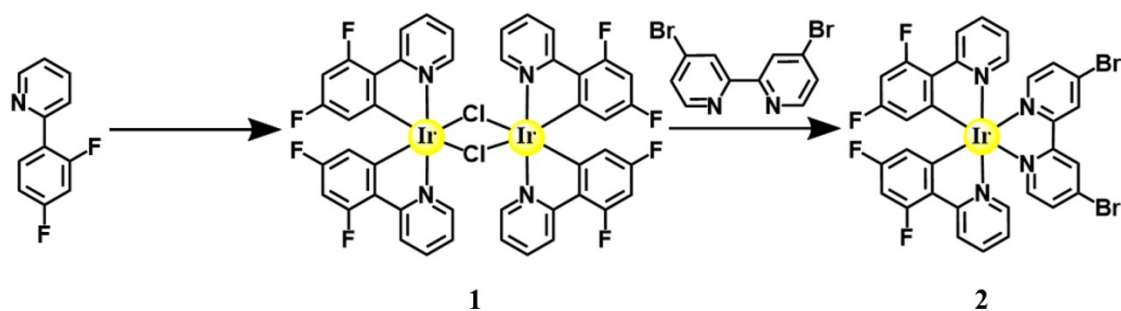

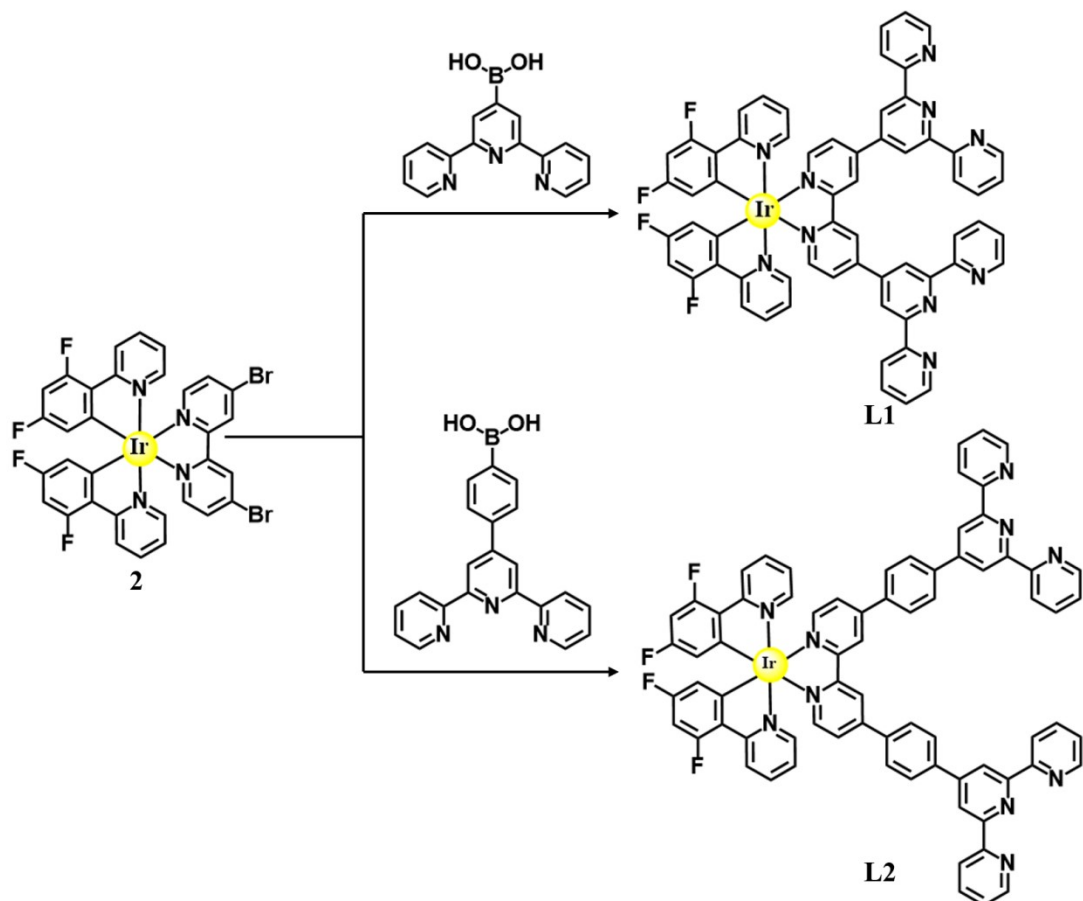

**Scheme S1:** The synthetic route of ligands **L1** and **L2**.

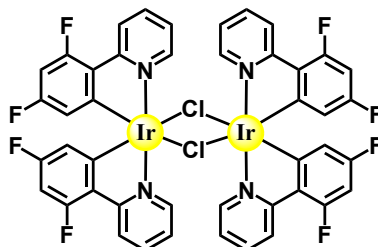

Compound **1<sup>1</sup>**: 2-(2,4-Difluorophenyl)pyridine (250 mg, 0.71 mmol) and  $\text{IrCl}_3 \cdot x\text{H}_2\text{O}$  (340 mg, 1.78 mmol) were added to a 500 mL flask, then 2-Ethoxyethanol (120 mL) and  $\text{H}_2\text{O}$  (40 mL) was added, heating the system to reflux at 110 °C under nitrogen for 24 h. After cooled to ambient temperature, the precipitates were filtered and washed with MeOH to afford compound 340 mg, 62.9 %.  $^1\text{H}$  NMR (400 MHz,  $\text{DMSO-d}_6$ )  $\delta$  9.79 (d,  $J = 5.0$  Hz, 2H), 9.56 (d,  $J = 4.9$  Hz, 2H), 8.30 (s, 2H), 8.25 (s, 2H), 8.21 (s, 2H), 8.13 (s, 2H), 7.67 (s, 2H), 7.58 (s, 2H), 6.90 -6.76 (m, 4H), 5.73 (d,  $J = 8.5$  Hz, 2H), 5.07 (d,  $J = 8.7$  Hz, 2H).

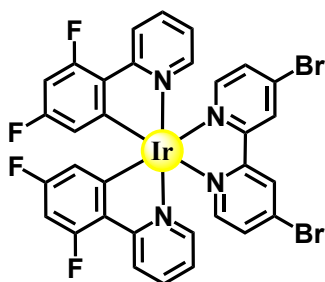

Compound **2<sup>1</sup>**: Added compound **1** (300 mg, 0.25 mmol) and 4,4'-Dibromo-2,2'-bipyridyl (180 mg, 0.55mmol), MeOH (100 mL) and CH<sub>2</sub>Cl<sub>2</sub> (100 mL) to a 250 mL flask, heated to reflux at 50 °C for 12 h. After cooled to ambient temperature, purified by column chromatograph with neutral Al<sub>2</sub>O<sub>3</sub> (200-300 mesh) with DCM and MeOH as eluent, a yellow powder was generated: 296 mg, 66.78 %. <sup>1</sup>H NMR (400 MHz, CD<sub>3</sub>CN) δ 10.33 (d, *J* = 1.8 Hz, 2H, H<sup>m</sup>), 9.70 (ddt, *J* = 8.5, 2.3, 1.1 Hz, 2H, H<sup>j</sup>), 9.31 (td, *J* = 8.0, 1.6 Hz, 2H, H<sup>f</sup>), 9.20 – 9.14 (m, 4H, H<sup>k</sup>, H<sup>e</sup>), 9.08 – 9.02 (m, 2H, H<sup>l</sup>), 8.50 (ddd, *J* = 7.4, 5.8, 1.4 Hz, 2H, H<sup>i</sup>), 8.07 (ddd, *J* = 12.7, 9.3, 2.4 Hz, 2H, H<sup>c</sup>), 7.04 (dd, *J* = 8.5, 2.4 Hz, 2H, H<sup>a</sup>). ESI-MS (1031.51 calcd. For C<sub>32</sub>H<sub>18</sub>Br<sub>2</sub>F<sub>10</sub>IrN<sub>4</sub>P with PF<sub>6</sub><sup>-</sup>): *m/z* 886.9506 [M-PF<sub>6</sub><sup>-</sup>]<sup>+</sup> (calcd *m/z*: 886.9518).

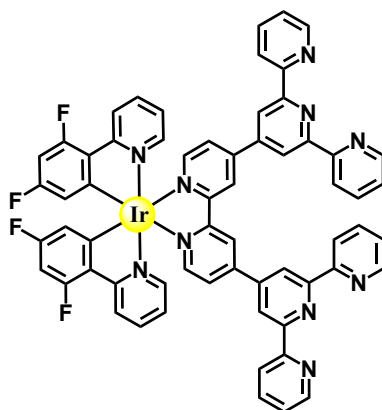

Ligand **L1**: To a flask containing a mixture of compound **2** (70 mg, 0.059 mmol), 2,6-di(pyridin-2-yl)pyridin-4-yl-4-boronic acid (87 mg, 0.32 mmol) and K<sub>2</sub>CO<sub>3</sub> (48 mg, 0.35 mmol), CH<sub>3</sub>CN (100 mL), CH<sub>3</sub>OH (10 mL) and H<sub>2</sub>O (10 mL) were added. The system was degassed for 10 min, and Pd(PPh<sub>3</sub>)<sub>4</sub> (14 mg, 0.012 mmol) as the catalyst was added. The mixture was stirred at 85 °C under nitrogen for 72 h. After cooling to ambient temperature, the solvent was evaporated *in vacuo* and the residue was purified by column chromatography (Al<sub>2</sub>O<sub>3</sub>), eluting with a mixture of MeOH and CH<sub>2</sub>Cl<sub>2</sub>. The

complex was obtained, as a yellow precipitate: 215 mg, 78.5 %.  $^1\text{H}$  NMR (400 MHz,  $\text{CD}_3\text{CN}$ )  $\delta$  9.23 (d,  $J = 1.9$  Hz, 2H,  $\text{H}^m$ ), 8.91 (s, 4H, tpy- $\text{H}^{3',5'}$ ), 8.76 – 8.70 (m, 8H, tpy- $\text{H}^{3,3''}$ , tpy- $\text{H}^{6,6''}$ ), 8.40 (d,  $J = 8.4$  Hz, 2H,  $\text{H}^j$ ), 8.21 (d,  $J = 5.8$  Hz, 2H,  $\text{H}^k$ ), 8.05 – 7.94 (m, 8H,  $\text{H}^e$ ,  $\text{H}^f$ , tpy- $\text{H}^{4,4''}$ ), 7.81 (dd,  $J = 5.6, 1.5$  Hz, 2H,  $\text{H}^l$ ), 7.48 (ddd,  $J = 7.5, 3.7, 1.0$  Hz, 4H, tpy- $\text{H}^{5,5''}$ ), 7.18 (ddd,  $J = 7.4, 5.8, 1.4$  Hz, 2H,  $\text{H}^i$ ), 6.78 (ddd,  $J = 12.2, 9.5, 2.4$  Hz, 2H,  $\text{H}^c$ ), 5.84 (dd,  $J = 8.6, 2.4$  Hz, 2H,  $\text{H}^a$ ).  $^{19}\text{F}$  NMR (471 MHz,  $\text{CD}_3\text{CN}$ )  $\delta$  -107.94 (d, 2F, ortho), -109.90 (d, 2F, para). ESI-MS (1336.23 calcd. For  $\text{C}_{62}\text{H}_{38}\text{F}_{10}\text{IrN}_{10}\text{P}$  with  $\text{PF}_6^-$ ):  $m/z$  1191.2900  $[\text{M}-\text{PF}_6^-]^+$  (calcd  $m/z$ : 1191.2908).

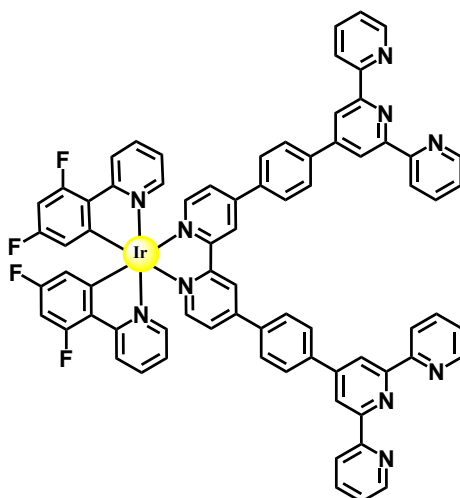

Ligand **L2**:Compound **2** (70 mg, 0.059 mmol) and 4'-(4-boronatophenyl)[2,2':6',2'']terpyridine (87 mg, 0.25 mmol) were added to a 250 mL flask, then  $\text{CH}_3\text{CN}:\text{H}_2\text{O}:\text{CH}_3\text{OH}$  (120 mL, V:V:V, 10:1:1) and  $\text{K}_2\text{CO}_3$  (48 mg, 0.35 mmol) were added, The system was degassed for 10 min, and  $\text{Pd}(\text{PPh}_3)_4$  (14 mg, 0.012 mmol) as the catalyst was added. The mixture was stirred at 85 °C under nitrogen for 72 h, after cooled to ambient temperature, purified by column chromatograph with neutral  $\text{Al}_2\text{O}_3$ (200-300 mesh) with DCM and MeOH as eluent, a yellow powder was generated: 215 mg, 78.5 %.  $^1\text{H}$  NMR (400 MHz,  $\text{CD}_3\text{CN}$ )  $\delta$  8.93 (d,  $J = 1.9$  Hz, 2H,  $\text{H}^m$ ), 8.74 (s, 4H, tpy- $\text{H}^{3',5'}$ ), 8.68 – 8.59 (m, 8H, tpy- $\text{H}^{3,3''}$ , tpy- $\text{H}^{6,6''}$ ), 8.30 (d,  $J = 8.5$  Hz, 2H,  $\text{H}^j$ ), 8.05 (s, 8H,  $\text{H}^g$ ,  $\text{H}^h$ ), 8.00 (d,  $J = 5.8$  Hz, 2H,  $\text{H}^k$ ), 7.94 – 7.83 (m, 6H,  $\text{H}^f$ , tpy- $\text{H}^{4,4''}$ ), 7.78 (dd,  $J = 5.9, 1.9$  Hz, 2H,  $\text{H}^e$ ), 7.72 (d,  $J = 5.9$  Hz, 2H,  $\text{H}^l$ ), 7.37 (ddd,  $J = 7.5, 4.7, 1.2$  Hz, 4H, tpy- $\text{H}^{5,5''}$ ), 7.12 – 7.04 (m, 2H,  $\text{H}^i$ ), 6.67 (ddd,  $J = 12.2, 9.3, 2.5$  Hz, 2H,  $\text{H}^c$ ), 5.73 (dd,  $J = 8.5, 2.4$  Hz, 2H,  $\text{H}^a$ ).  $^{19}\text{F}$  NMR (471 MHz,  $\text{CD}_3\text{CN}$ )  $\delta$  -108.18 (d, 2F, ortho), -110.06 (d, 2F, para). ESI-MS (1488.43 calcd. For  $\text{C}_{74}\text{H}_{46}\text{F}_{10}\text{IrN}_{10}\text{P}$  with

$\text{PF}_6^-$ :  $m/z$  1343.3596  $[\text{M}-\text{PF}_6^-]^+$  (calcd  $m/z$ : 1343.3527).

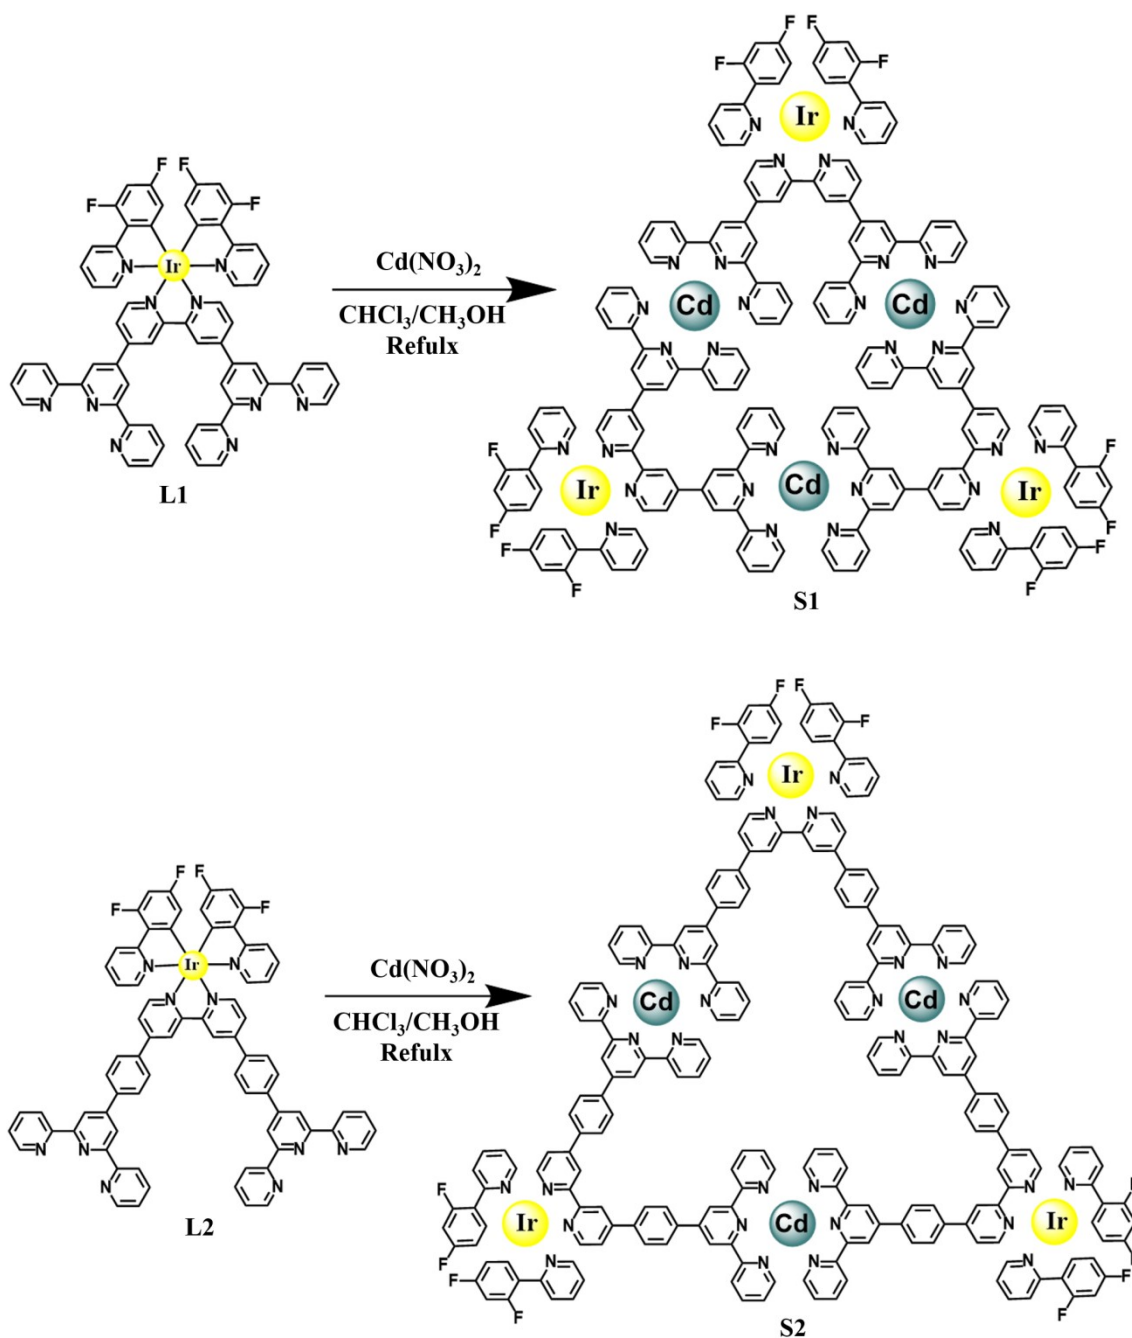

**Scheme S2:** The synthetic route of metallo-organic triangles **S1** and **S2**.

Triangle **S1**: Ligand **L1** (3.18 mg, 2.38  $\mu\text{mol}$ ) and  $\text{Cd}(\text{NO}_3)_2 \cdot 4\text{H}_2\text{O}$  (0.74 mg, 2.39  $\mu\text{mol}$ ) were added into a 100 mL flask, then a solvent mixture of  $\text{CHCl}_3/\text{CH}_3\text{OH}$  (20 mL, v/v, 1:1) was added. The mixture was refluxed for 12 h. After cooled to ambient temperature, excess  $\text{NH}_4\text{PF}_6$  in  $\text{CH}_3\text{OH}$  was added to get a black precipitate, which was filtered and washed with  $\text{CH}_3\text{OH}$  to generate a light yellow solid: 3.81 mg, yield 92%.  $^1\text{H}$  NMR (600 MHz,  $\text{CD}_3\text{CN}$ )  $\delta$  9.43 (s, 6H,  $\text{H}^m$ ), 9.11 (s, 12H,  $\text{tpy}-\text{H}^{3',5'}$ ), 8.80-8.79 (d,

$J = 15$  Hz, 12H, tpy- $H^{3,3''}$ ), 8.48-8.47 (d,  $J = 15$  Hz, 6H,  $H^j$ ), 8.43-8.42 (d,  $J = 15$  Hz, 6H,  $H^k$ ), 8.28-8.27 (d,  $J = 15$  Hz, 6H,  $H^l$ ), 8.23-8.20 (m,  $J = 24$  Hz, 12H, tpy- $H^{4,4''}$ ), 8.14-8.13 (d,  $J = 15$  Hz, 12H, tpy- $H^{6,6''}$ ), 8.06-8.03 (m,  $J = 21$  Hz, 6H,  $H^i$ ), 7.88-7.87 (m,  $J = 18$  Hz, 6H,  $H^e$ ), 7.49-7.47 (m,  $J = 21$  Hz, 12H, tpy- $H^{5,5''}$ ), 7.24-7.22 (m,  $J = 21$  Hz, 6H,  $H^f$ ), 6.87-6.84 (m,  $J = 24$  Hz, 6H,  $H^c$ ), 5.92-5.90 (d,  $J = 15$  Hz, 6H,  $H^a$ ).  $^{19}\text{F}$  NMR (471 MHz,  $\text{CD}_3\text{CN}$ )  $\delta$  -107.73 (d, 6F, ortho), -109.74 (d, 6F, para). ESI-MS (5226.29 calcd. for  $\text{C}_{186}\text{H}_{120}\text{Cd}_3\text{F}_{66}\text{Ir}_3\text{N}_{30}\text{P}_9$  with  $\text{PF}_6^-$ ):  $m/z$  1595.81 [ $\text{M}-3\text{PF}_6^-$ ] $^{3+}$  (calcd  $m/z$ : 1595.80), 1160.60 [ $\text{M}-4\text{PF}_6^-$ ] $^{4+}$  (calcd  $m/z$ : 1160.61), 899.50 [ $\text{M}-5\text{PF}_6^-$ ] $^{5+}$  (calcd  $m/z$ : 899.49), 725.42 [ $\text{M}-6\text{PF}_6^-$ ] $^{6+}$  (calcd  $m/z$ : 725.41).

Triangle **S2**: Ligand **L2** (3.54 mg, 2.38  $\mu\text{mol}$ ) and  $\text{Cd}(\text{NO}_3)_2 \cdot 4\text{H}_2\text{O}$  (0.74 mg, 2.39  $\mu\text{mol}$ ) were added into a 100 mL flask, then a solvent mixture of  $\text{CHCl}_3/\text{CH}_3\text{OH}$  (20 mL, v/v, 1:1) was added. The mixture was refluxed for 12 h. After cooled to ambient temperature, excess  $\text{NH}_4\text{PF}_6$  in  $\text{CH}_3\text{OH}$  was added to get a black precipitate, which was filtered and washed with  $\text{CH}_3\text{OH}$  to generate a yellow solid: 3.07 mg, yield 91%.  $^1\text{H}$  NMR (600 MHz,  $\text{CD}_3\text{CN}$ )  $\delta$  9.14 (s, 6H,  $H^m$ ), 9.04 (s, 12H, tpy- $H^{3',5'}$ ), 8.83-8.81 (d,  $J = 18$  Hz, 12H, tpy- $H^{3,3''}$ ), 8.46-8.41 (m,  $J = 36$  Hz, 18H,  $H^g$ ,  $H^l$ ), 8.33-8.32 (d,  $J = 15$  Hz, 12H,  $H^h$ ), 8.26-8.24 (m,  $J = 18$  Hz, 12H, tpy- $H^{4,4''}$ ), 8.21-8.20 (d,  $J = 12$  Hz, 6H,  $H^j$ ), 8.16-8.15 (d,  $J = 15$  Hz, 12H, tpy- $H^{6,6''}$ ), 8.04-8.01 (d,  $J = 27$  Hz, 12H,  $H^k$ ,  $H^i$ ), 7.86-7.85 (d,  $J = 12$  Hz, 6H,  $H^e$ ), 7.56-7.53 (m,  $J = 21$  Hz, 12H, tpy- $H^{5,5''}$ ), 7.23-7.21 (m,  $J = 15$  Hz, 6H,  $H^f$ ), 6.84-6.80 (m,  $J = 24$  Hz, 6H,  $H^c$ ), 5.89-5.87 (d,  $J = 15$  Hz, 6H,  $H^a$ ).  $^{19}\text{F}$  NMR (471 MHz,  $\text{CD}_3\text{CN}$ )  $\delta$  -108.00 (d, 6F, ortho), -109.95 (d, 6F, para). ESI-MS (5678.36 calcd. for  $\text{C}_{222}\text{H}_{144}\text{Cd}_3\text{F}_{66}\text{Ir}_3\text{N}_{30}\text{P}_9$  with  $\text{PF}_6^-$ ):  $m/z$  990.73 [ $\text{M}-5\text{PF}_6^-$ ] $^{5+}$  (calcd  $m/z$ : 990.73), 801.45 [ $\text{M}-6\text{PF}_6^-$ ] $^{6+}$  (calcd  $m/z$ : 801.45), 666.25 [ $\text{M}-7\text{PF}_6^-$ ] $^{7+}$  (calcd  $m/z$ : 666.24), 564.84 [ $\text{M}-8\text{PF}_6^-$ ] $^{8+}$  (calcd  $m/z$ : 564.84).

### 3. $^1\text{H}$ NMR, $^{13}\text{C}$ NMR, 2D COSY and 2D NOESY spectra of ligands and complexes.

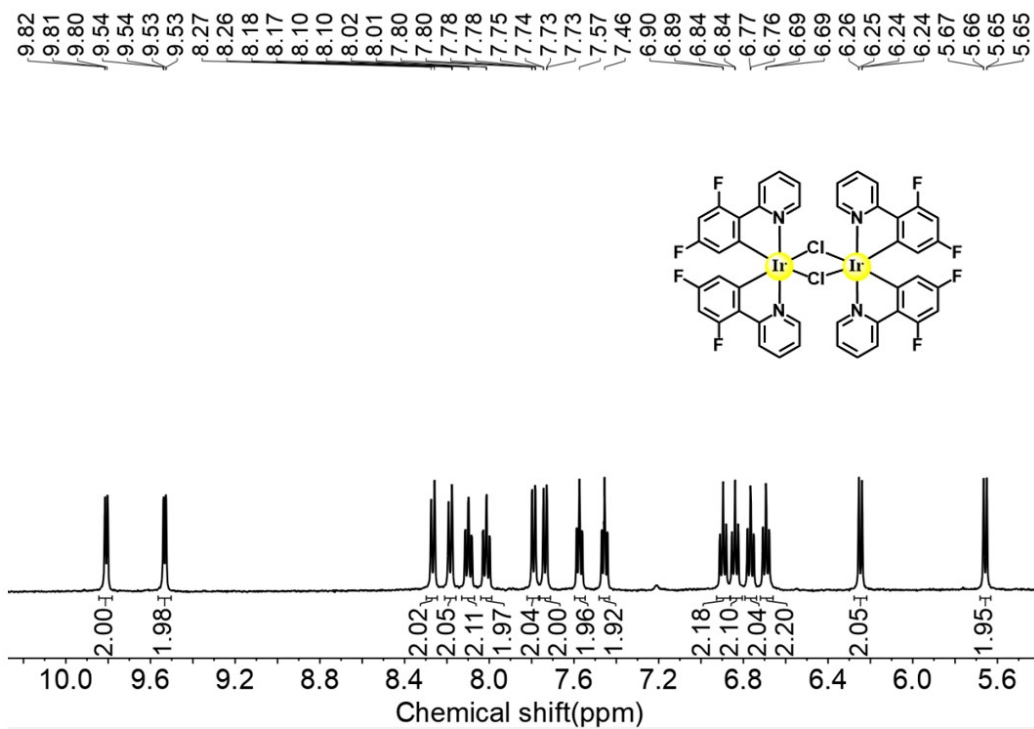

Figure S1:  $^1\text{H}$  NMR spectrum (400 MHz) of compound **1** in  $\text{DMSO-d}_6$ .

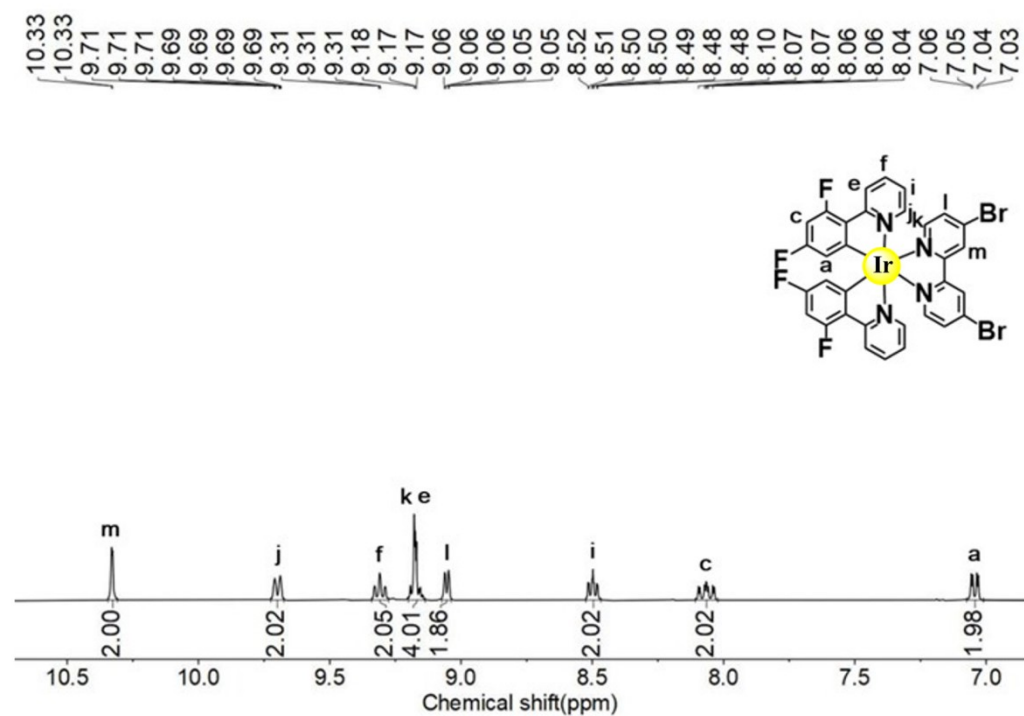

Figure S2:  $^1\text{H}$  NMR spectrum (400 MHz) of compound **2** in  $\text{CD}_3\text{CN}$ .

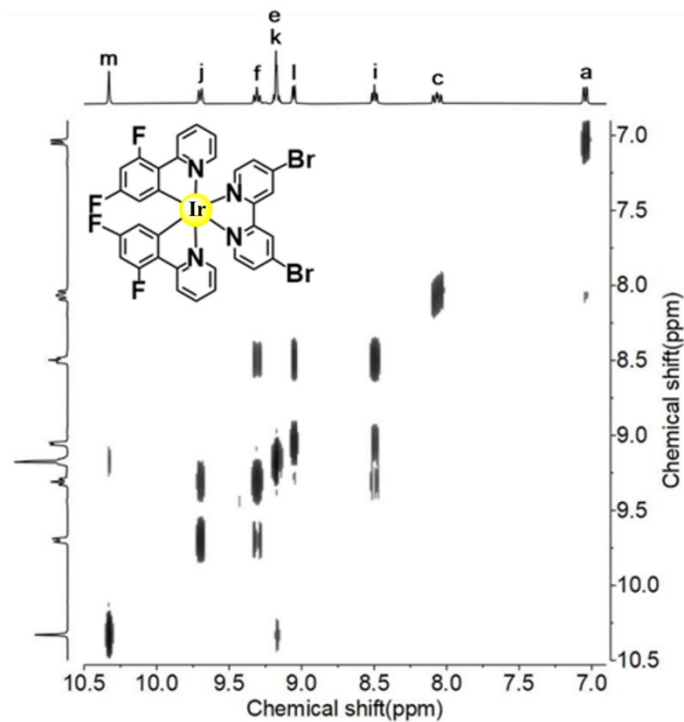

Figure S3: 2D COSY spectrum (400 MHz) of compound **2** in CD<sub>3</sub>CN.

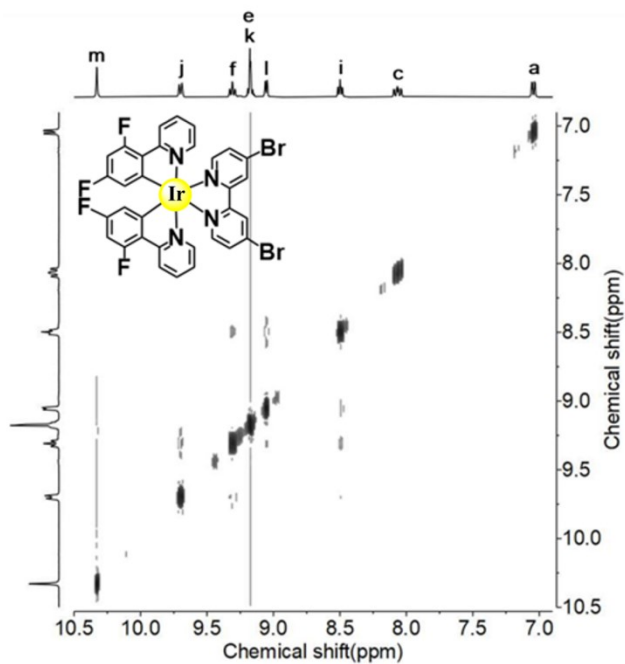

Figure S4: 2D NOESY spectrum (400 MHz) of compound **2** in CD<sub>3</sub>CN.

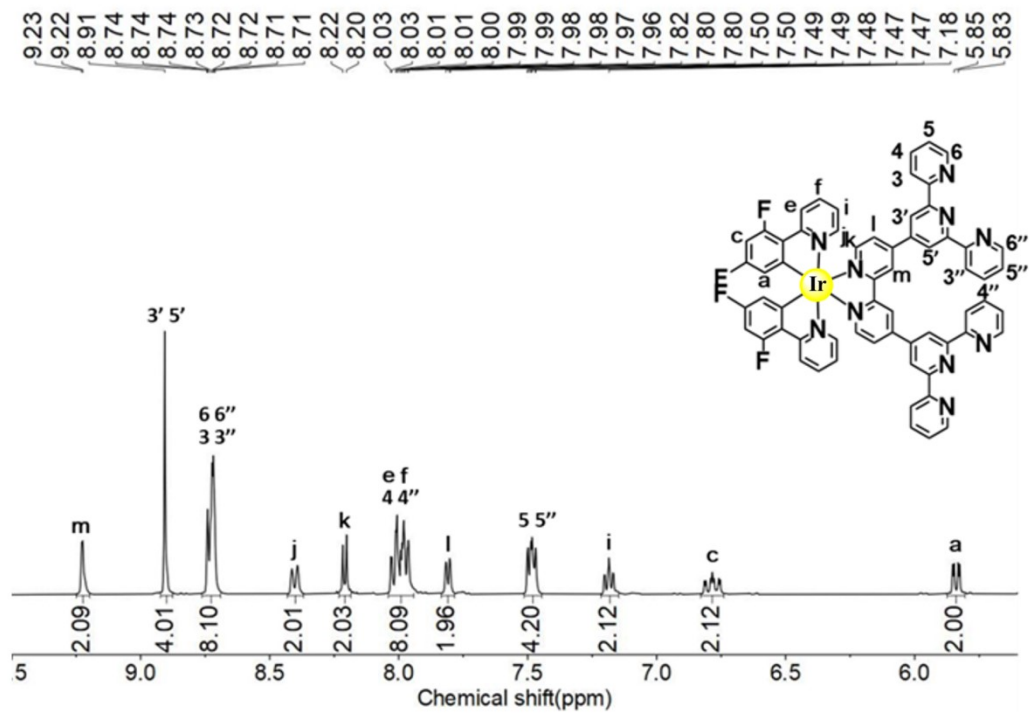

Figure S5:  $^1\text{H}$  NMR spectrum (400 MHz) of ligand **L1** in  $\text{CD}_3\text{CN}$ .

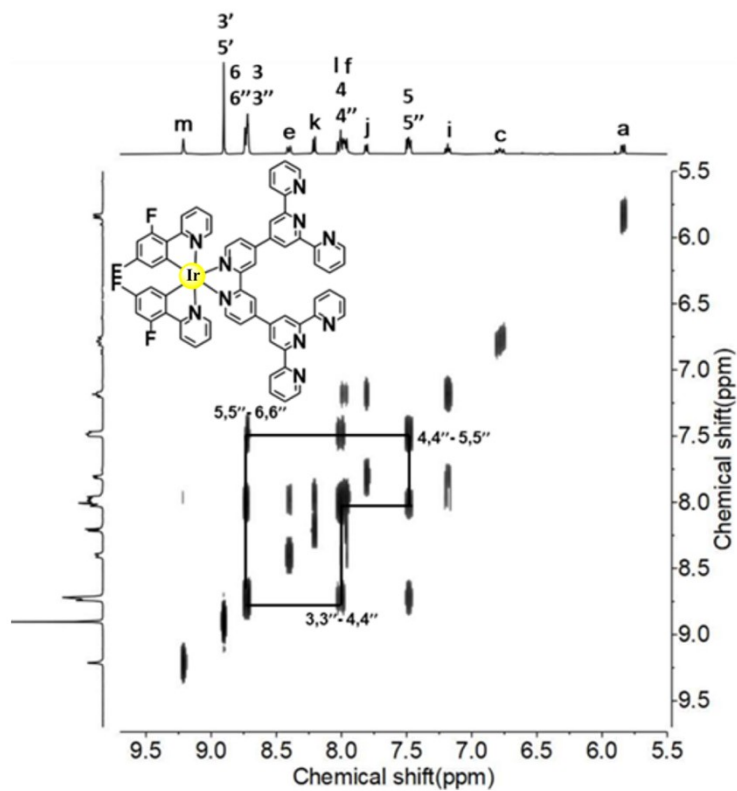

Figure S6: 2D COSY spectrum (400 MHz) of ligand **L1** in  $\text{CD}_3\text{CN}$ .

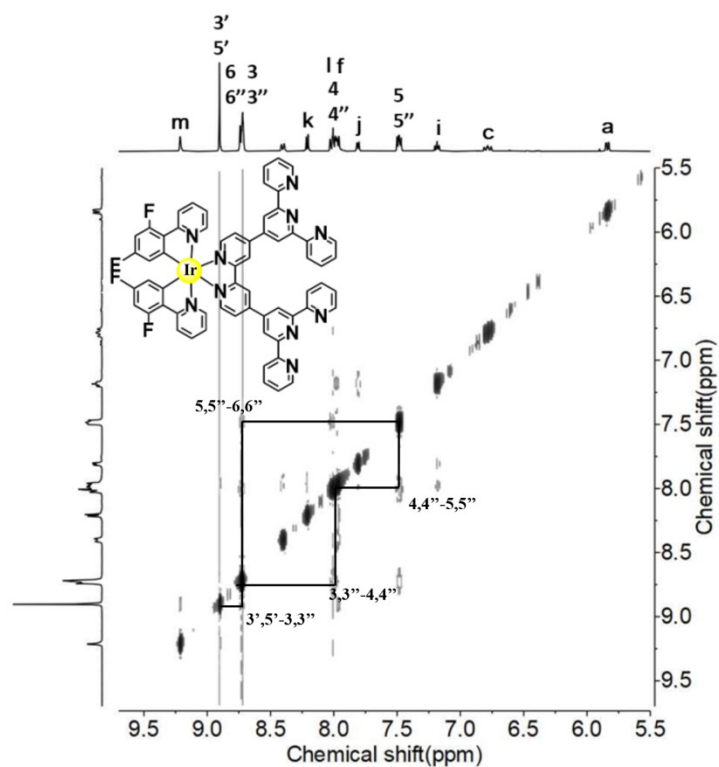

Figure S7: 2D NOESY spectrum (400 MHz) of ligand **L1** in CD<sub>3</sub>CN.

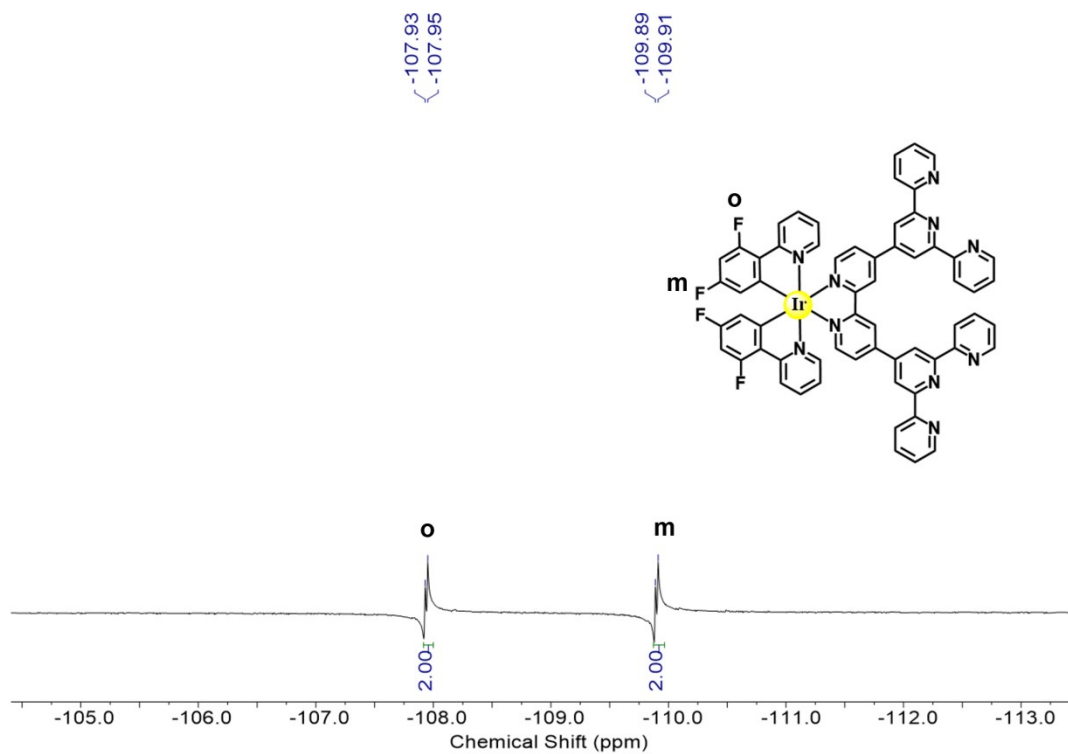

Figure S8: <sup>19</sup>F NMR spectrum (471 MHz) of ligand **L1** in CD<sub>3</sub>CN.

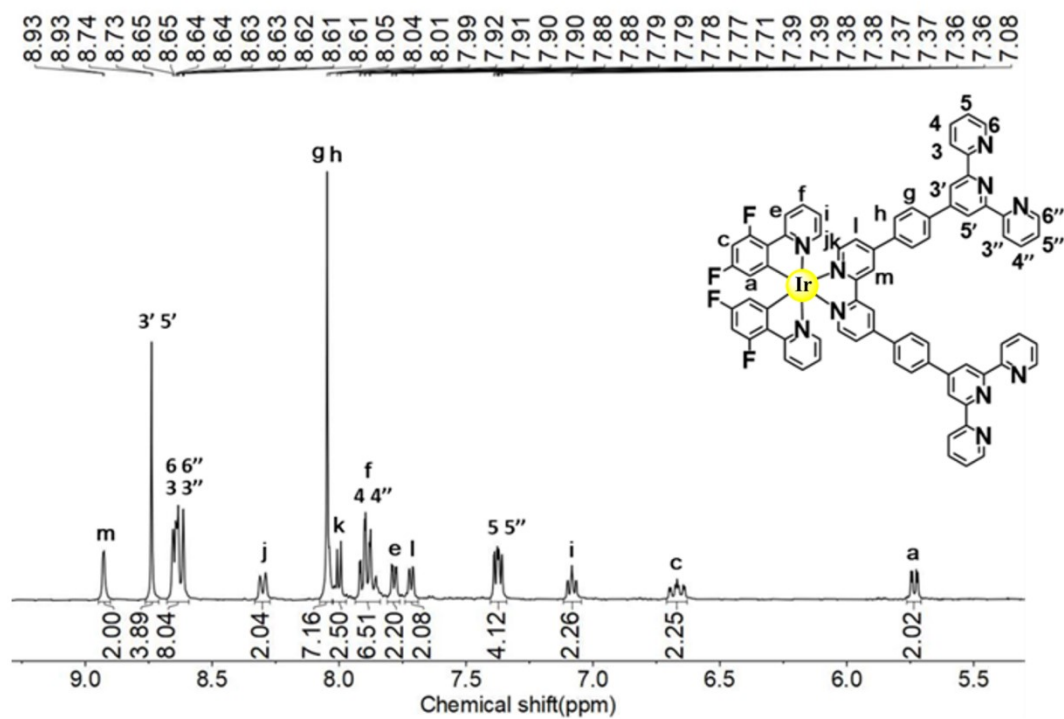

Figure S9:  $^1\text{H}$  NMR spectrum (400 MHz) of ligand **L2** in  $\text{CD}_3\text{CN}$ .

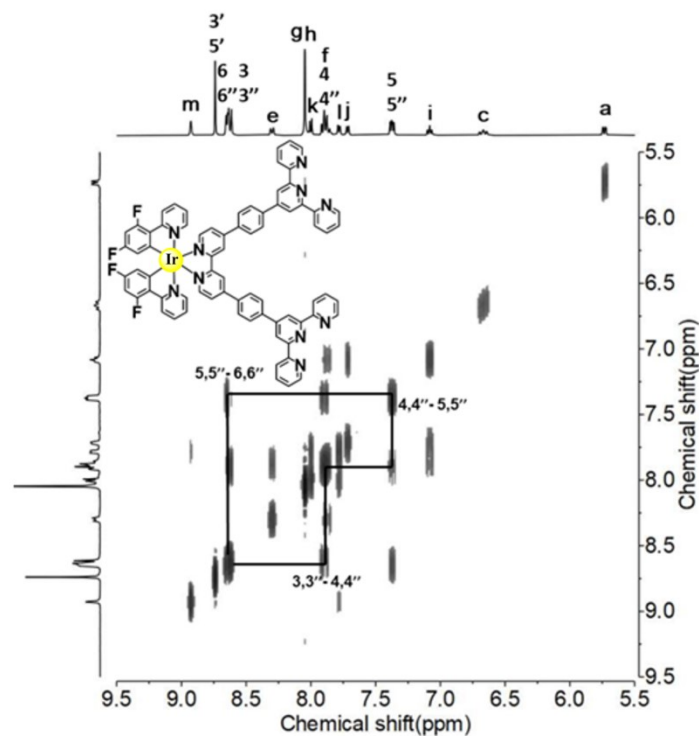

Figure S10: 2D COSY spectrum (400 MHz) of ligand **L2** in  $\text{CD}_3\text{CN}$ .

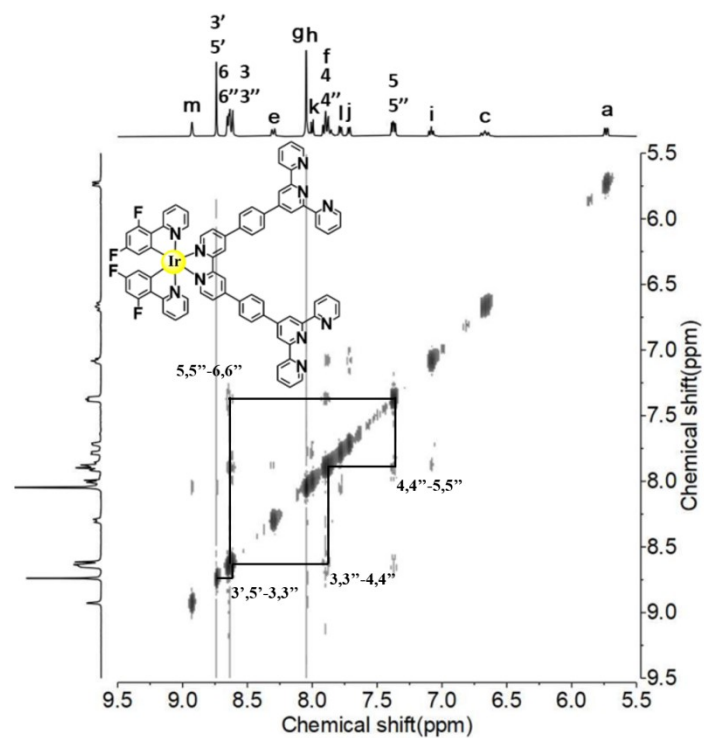

Figure S11: 2D NOESY spectrum (400 MHz) of ligand **L2** in CD<sub>3</sub>CN.

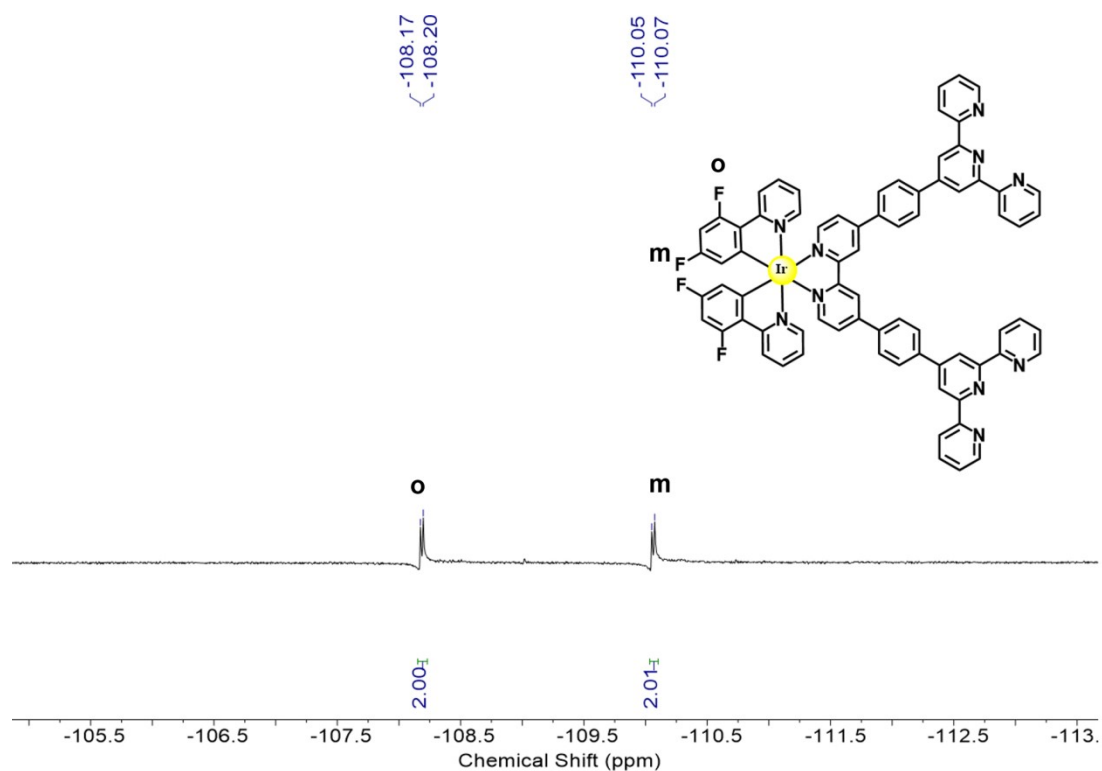

Figure S12: <sup>19</sup>F NMR spectrum (471 MHz) of ligand **L2** in CD<sub>3</sub>CN.

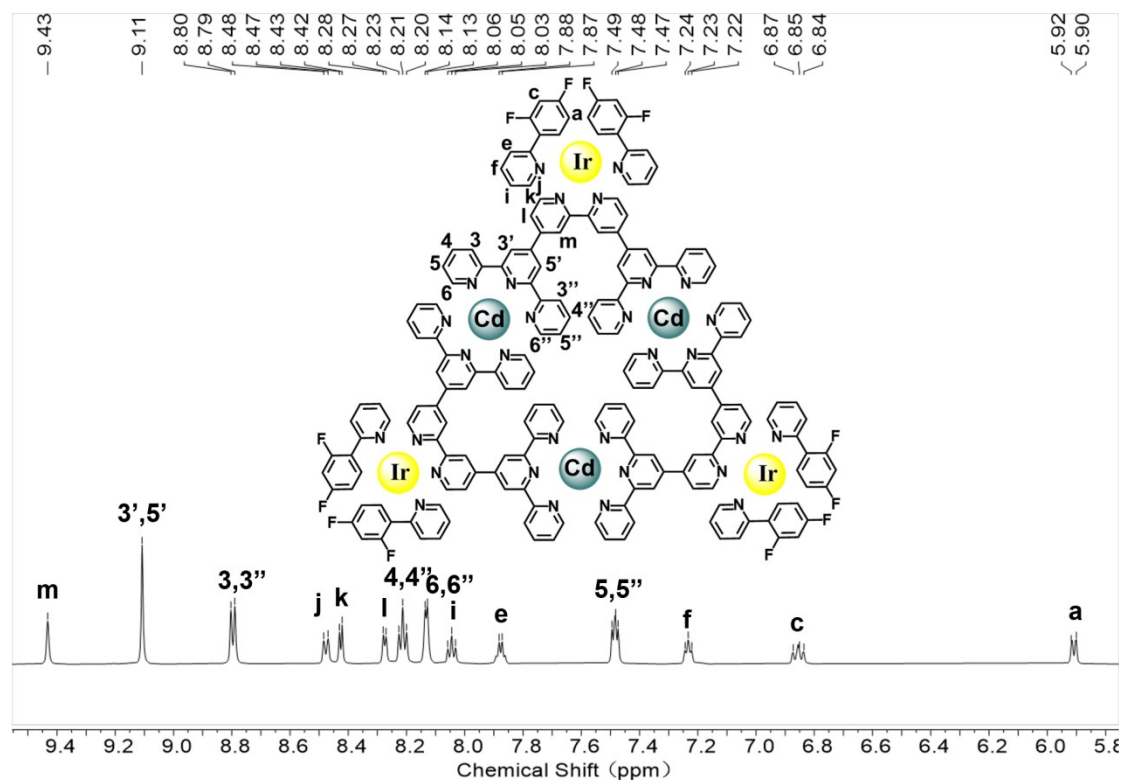

Figure S13.  $^1\text{H}$  NMR spectrum of triangle **S1** (600 MHz,  $\text{CD}_3\text{CN}$ , 298K).

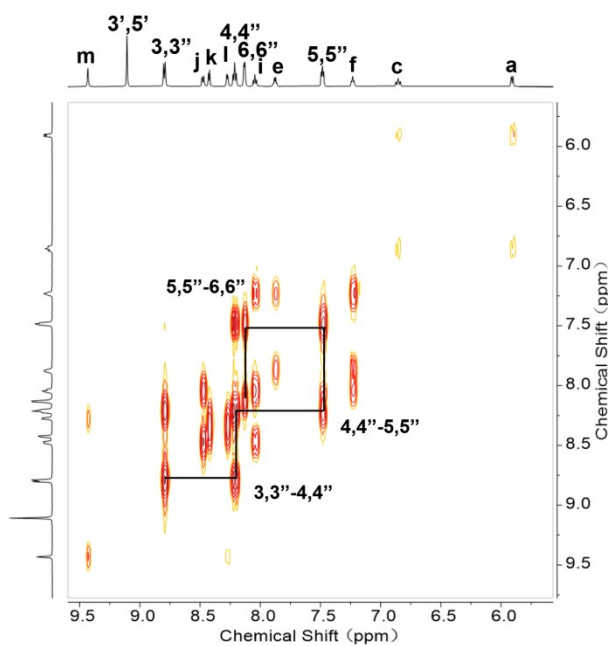

Figure S14. 2D COSY spectrum of triangle **S1** (600 MHz,  $\text{CD}_3\text{CN}$ , 298K).

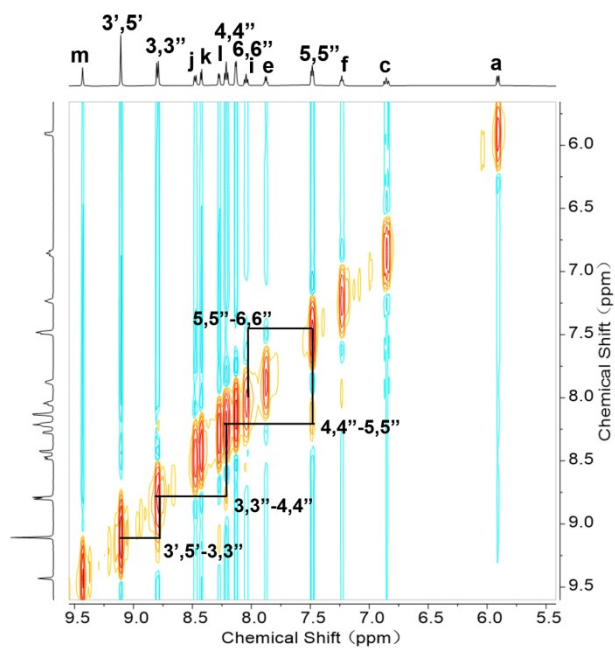

Figure S15. 2D NOESY spectrum of triangle **S1** (600 MHz, CD<sub>3</sub>CN, 298K).

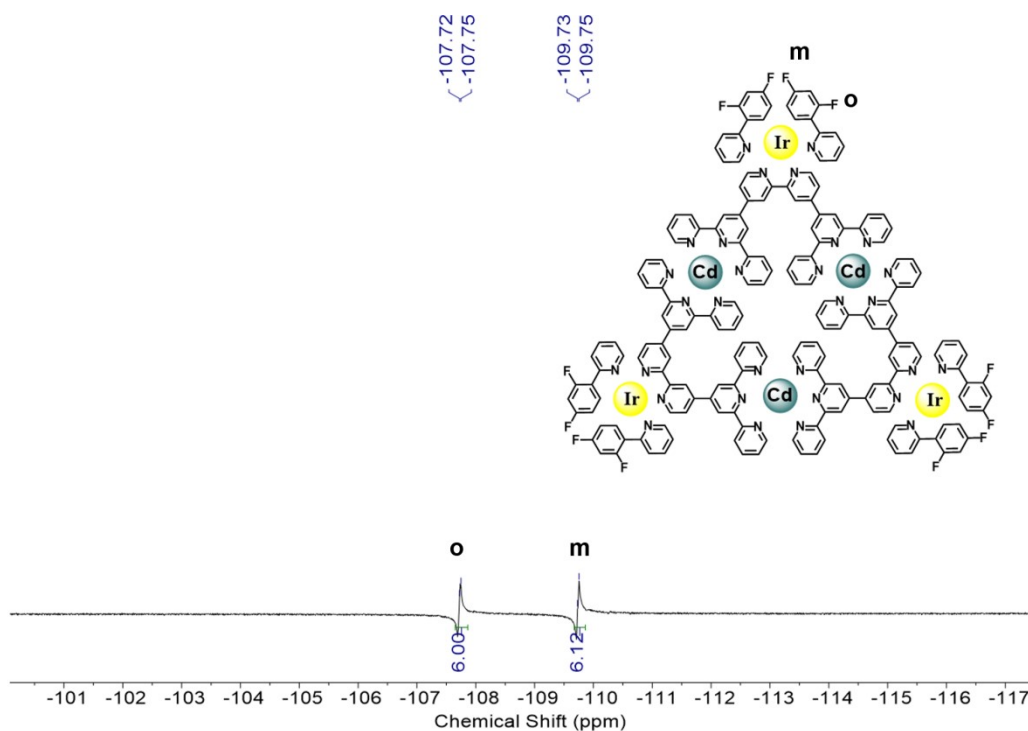

Figure S16: <sup>19</sup>F NMR spectrum of triangle **S1** (471 MHz, CD<sub>3</sub>CN, 298K).

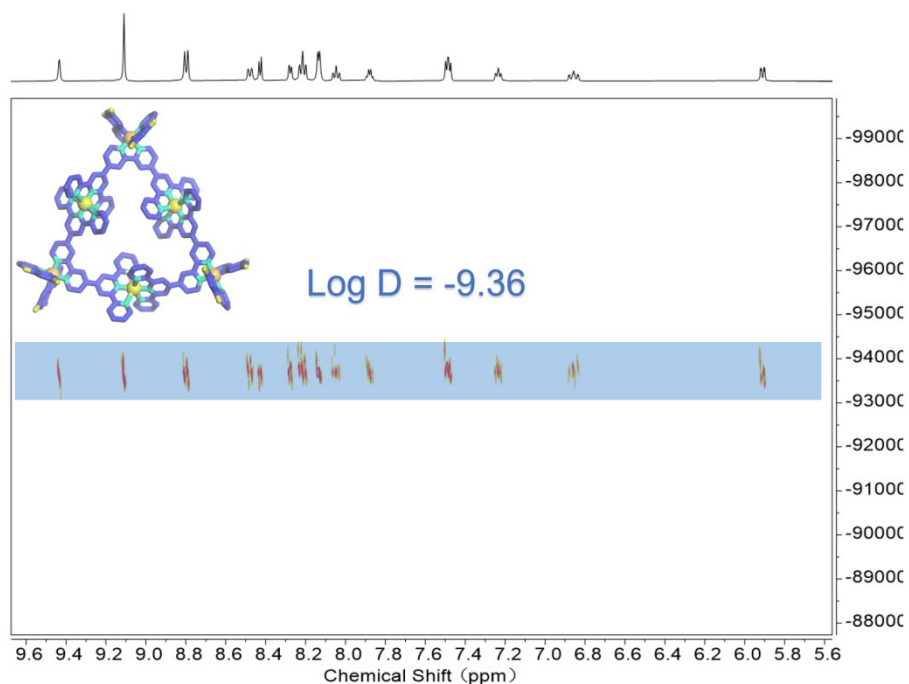

Figure S17. DOSY spectrum of triangle **S1** (600 MHz, CD<sub>3</sub>CN, 298K).

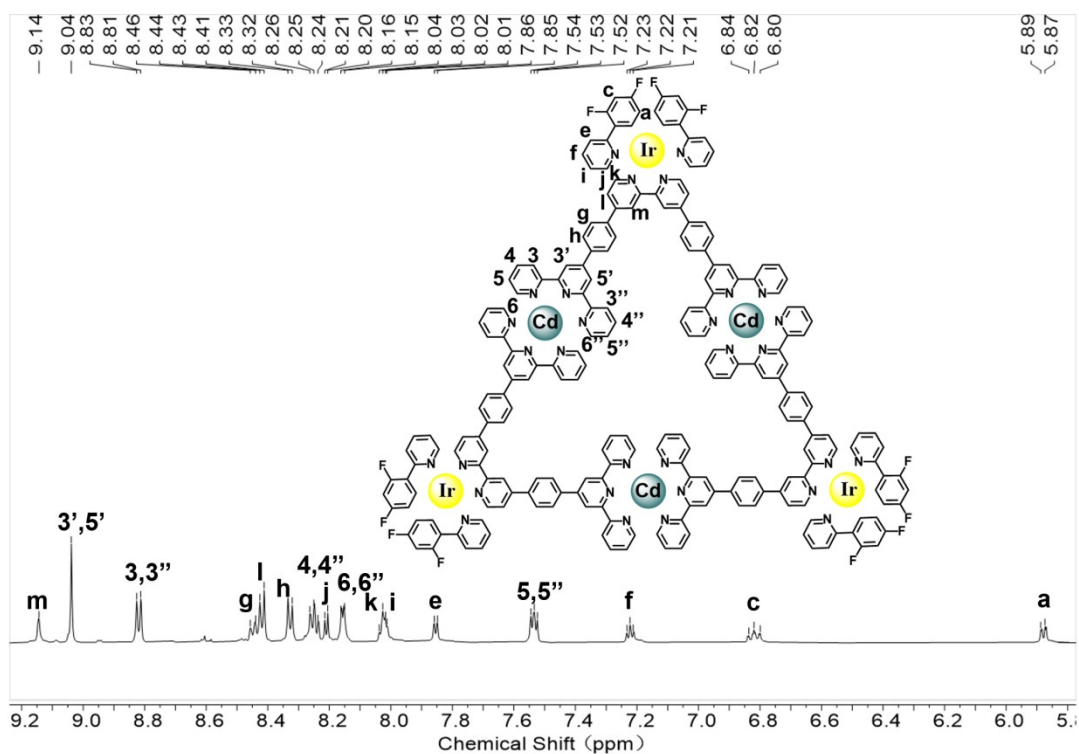

Figure S18. <sup>1</sup>H NMR spectrum of triangle **S2** (600 MHz, CD<sub>3</sub>CN, 298K).

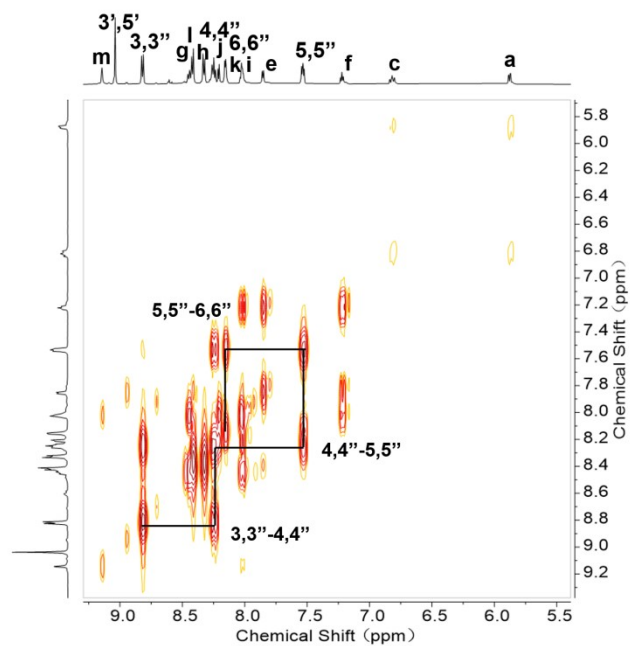

Figure S19. 2D COSY spectrum of triangle S2 (600 MHz, CD<sub>3</sub>CN, 298K).

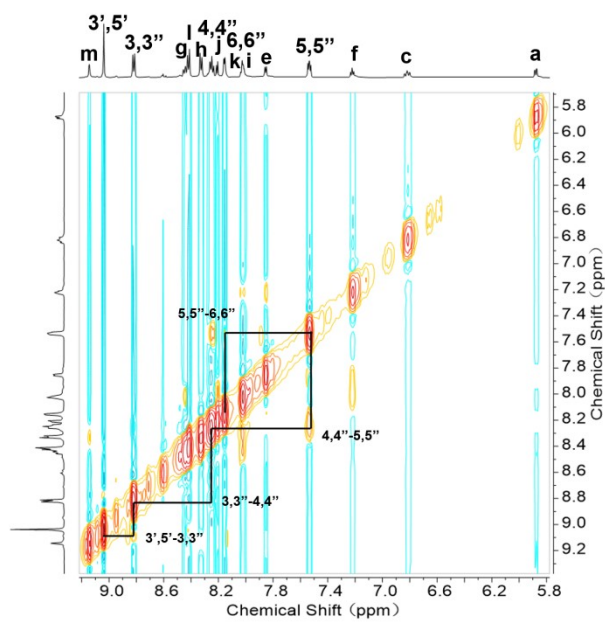

Figure S20. 2D NOESY spectrum of triangle S2 (600 MHz, CD<sub>3</sub>CN, 298K).

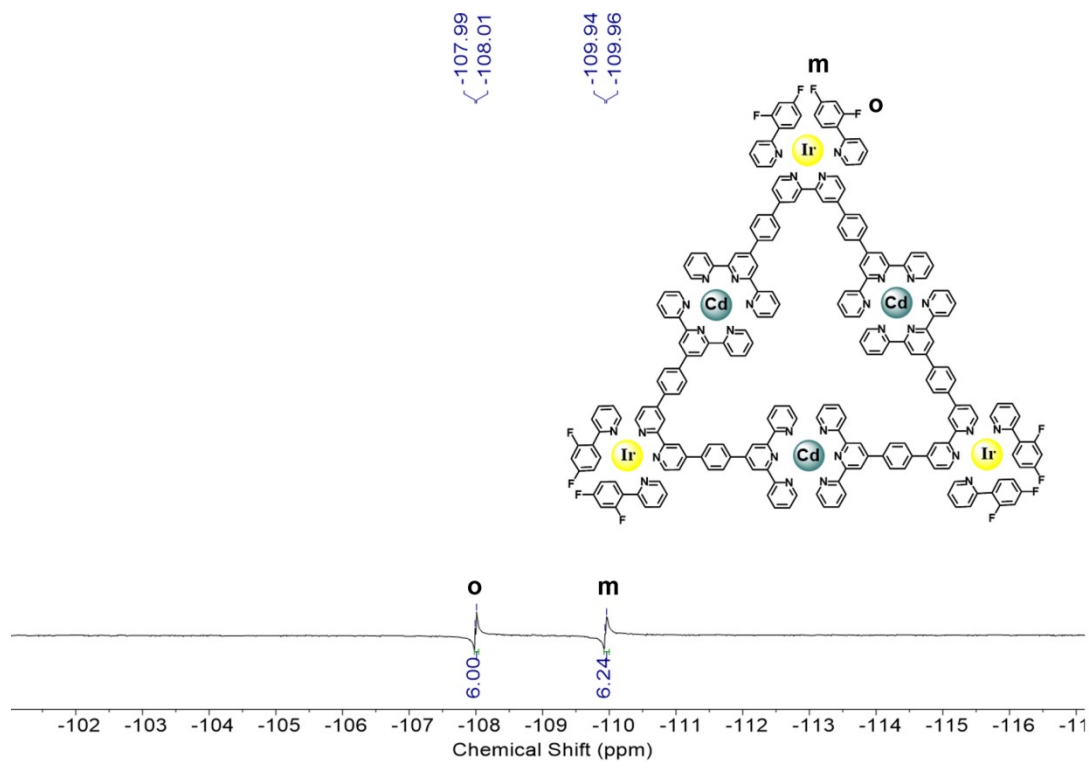

Figure S21:  $^{19}\text{F}$  NMR spectrum of triangle **S2** (471 MHz,  $\text{CD}_3\text{CN}$ , 298K).

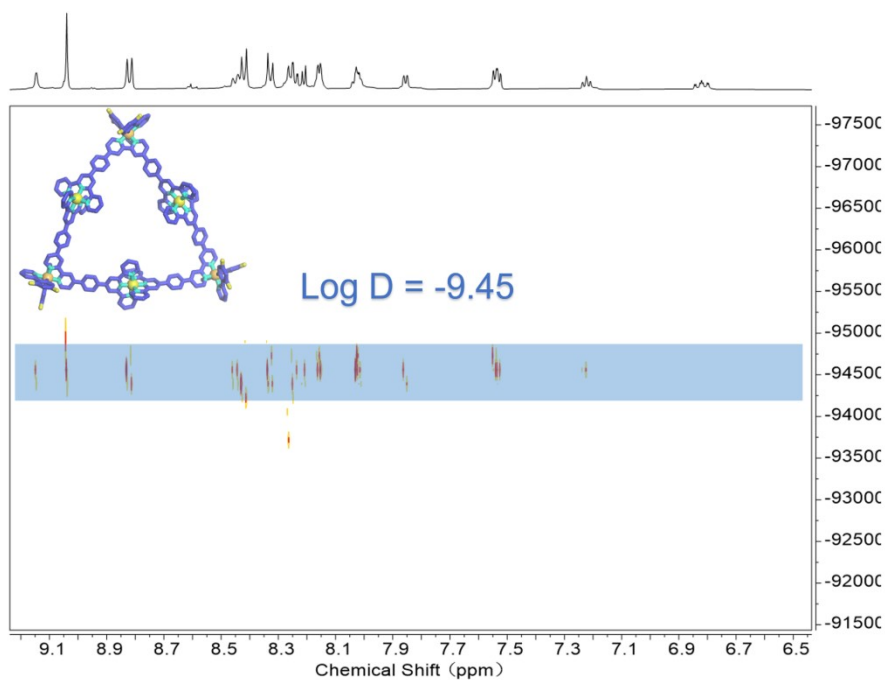

Figure S22. DOSY spectrum of triangle **S2** (600 MHz,  $\text{CD}_3\text{CN}$ , 298K).

#### 4. ESI-MS spectra data of ligands and complexes.

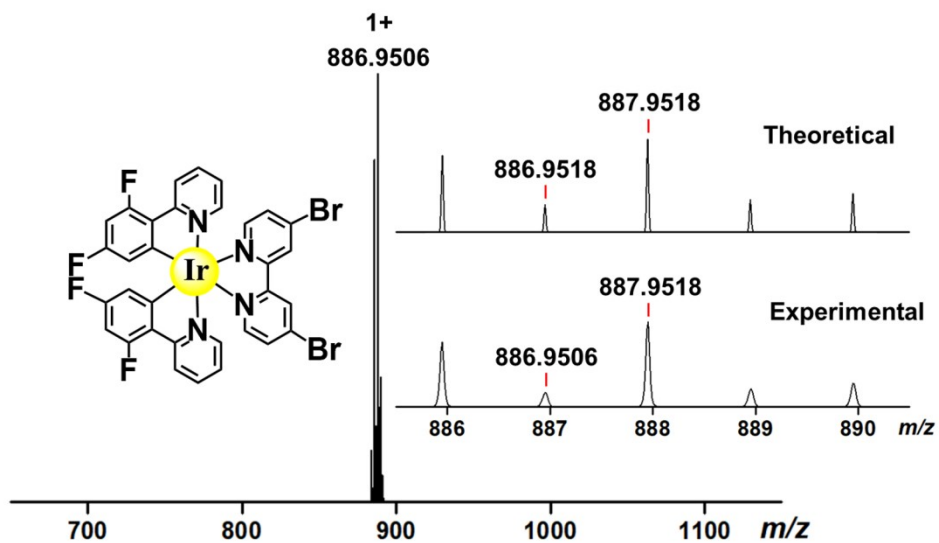

Figure S23. ESI-MS spectrum of compound **2** (PF<sub>6</sub><sup>-</sup> as counterion).

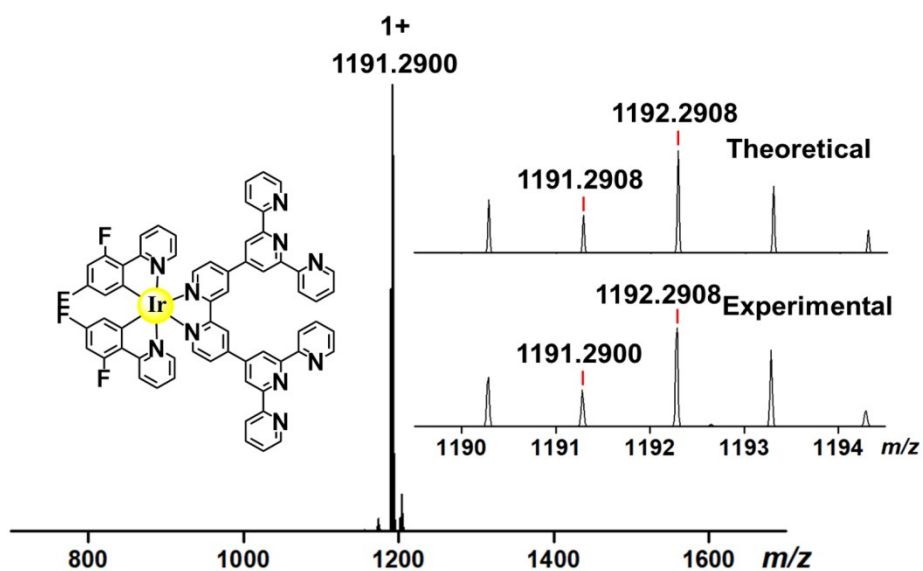

Figure S24. ESI-MS spectrum of ligand **L1** (PF<sub>6</sub><sup>-</sup> as counterion).

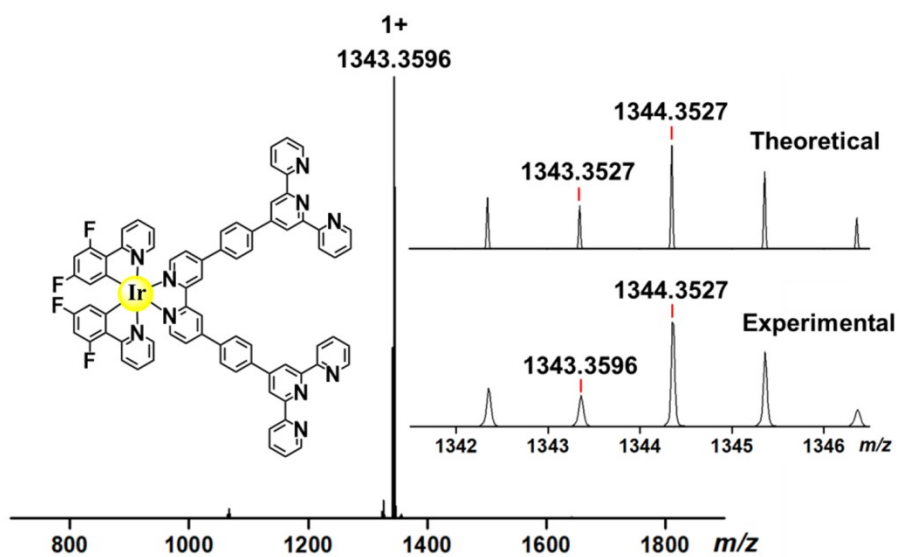

Figure S25. ESI-MS spectrum of ligand **L2** (PF<sub>6</sub><sup>-</sup> as counterion).

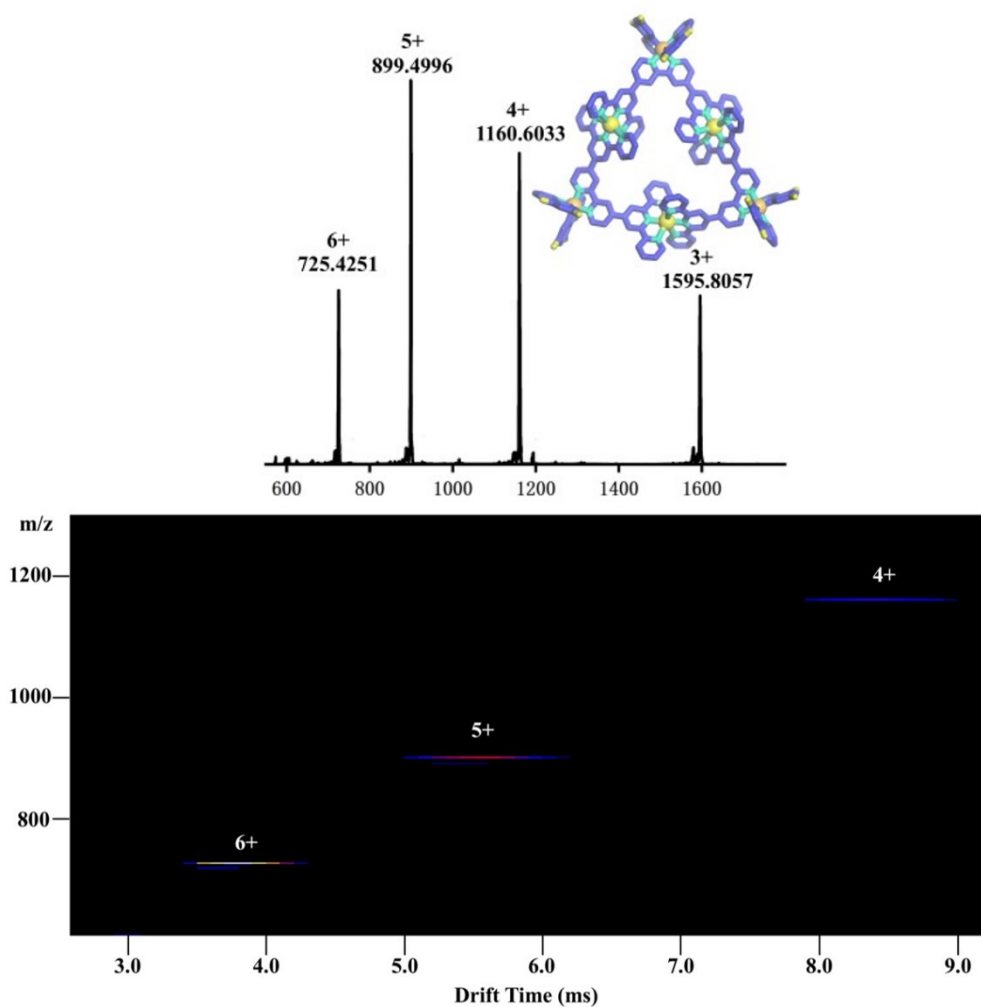

Figure S26. ESI-MS spectrum of triangle **S1** (PF<sub>6</sub><sup>-</sup> as counterion).

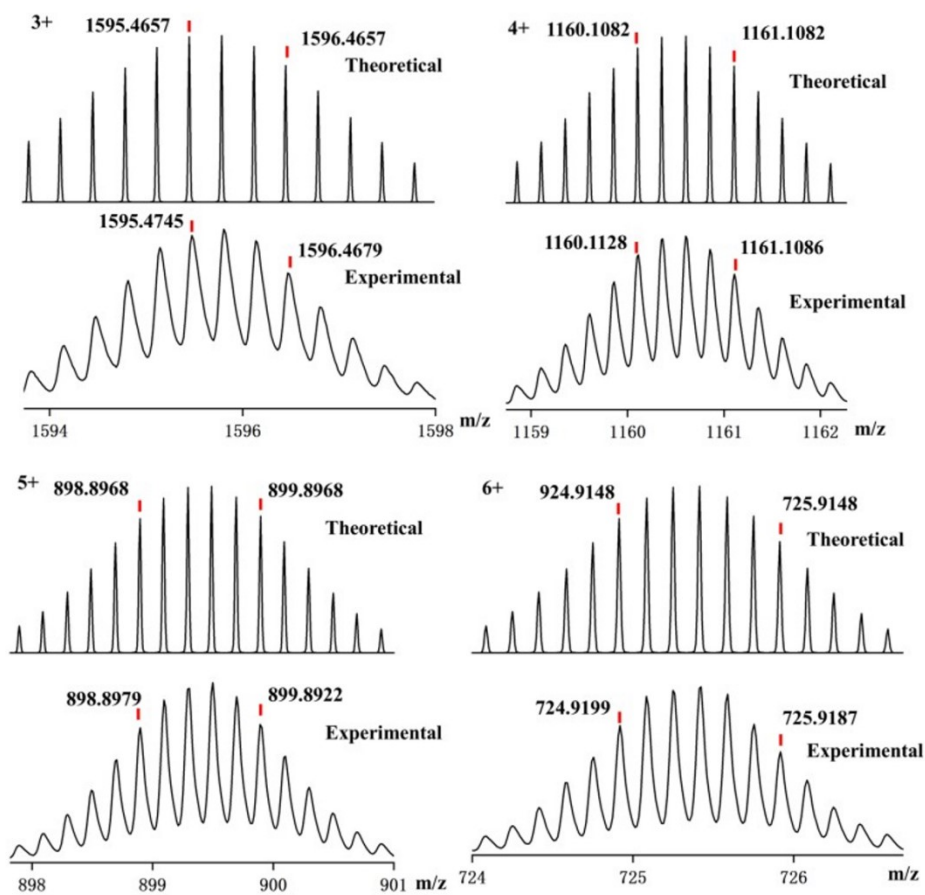

Figure S27. Isotope patterns of S1 ( $\text{PF}_6^-$  as counterion).

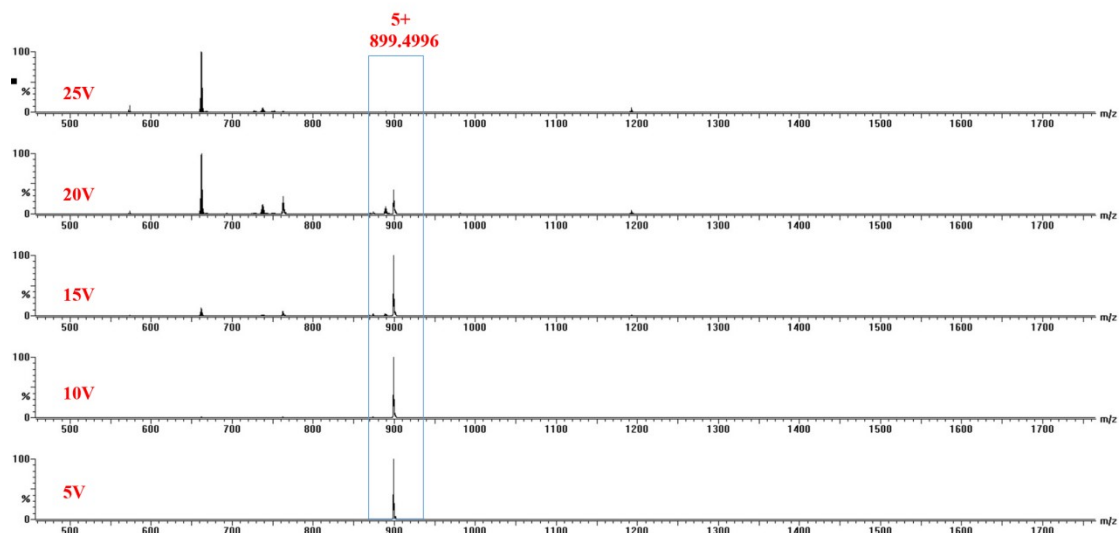

Figure S28. gMS2 of S1 at  $m/z$  899.4996 (5+) with different collision energies.

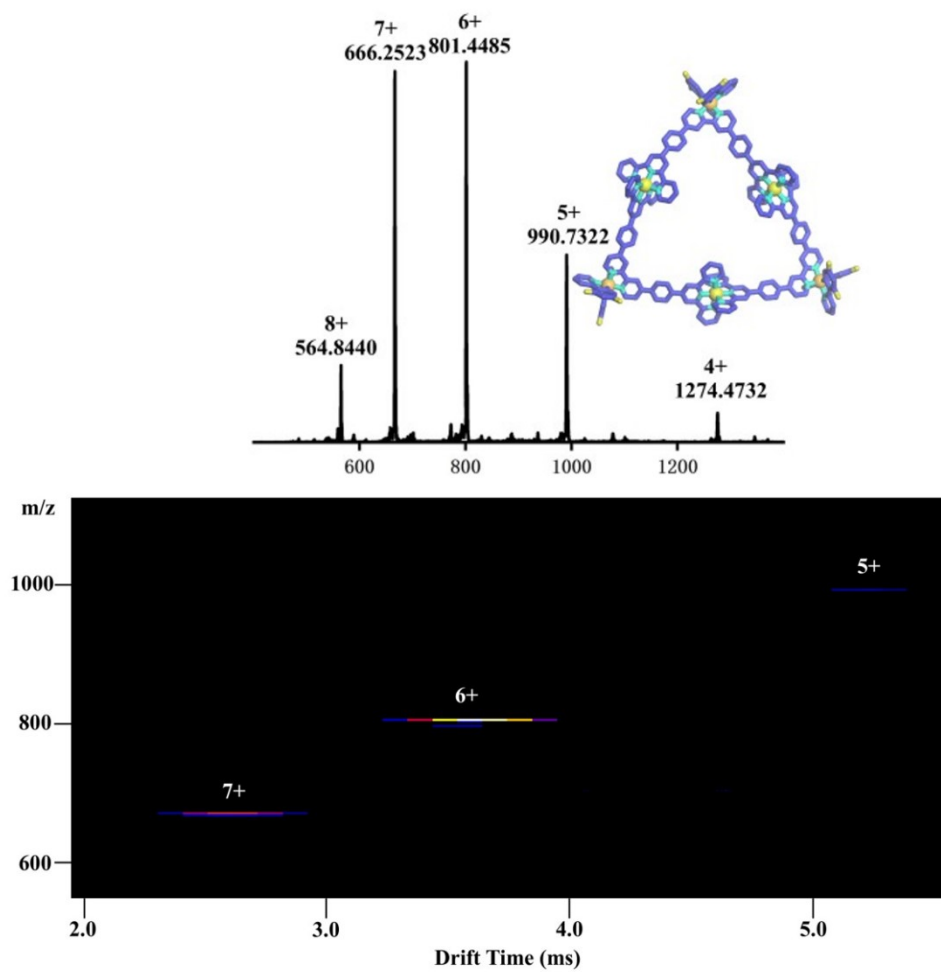

Figure S29. ESI-MS spectrum of triangle S2 ( $\text{PF}_6^-$  as counterion).

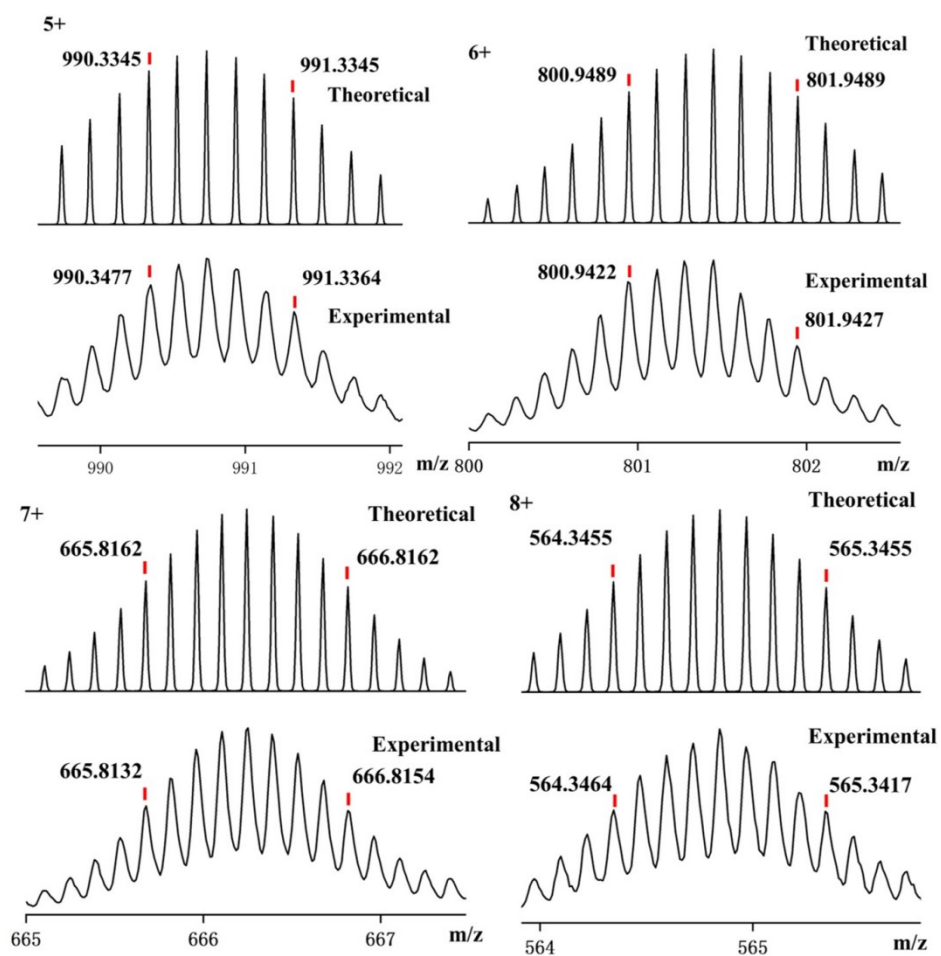

Figure S30. Isotope patterns of S2 (PF<sub>6</sub><sup>-</sup> as counterion).

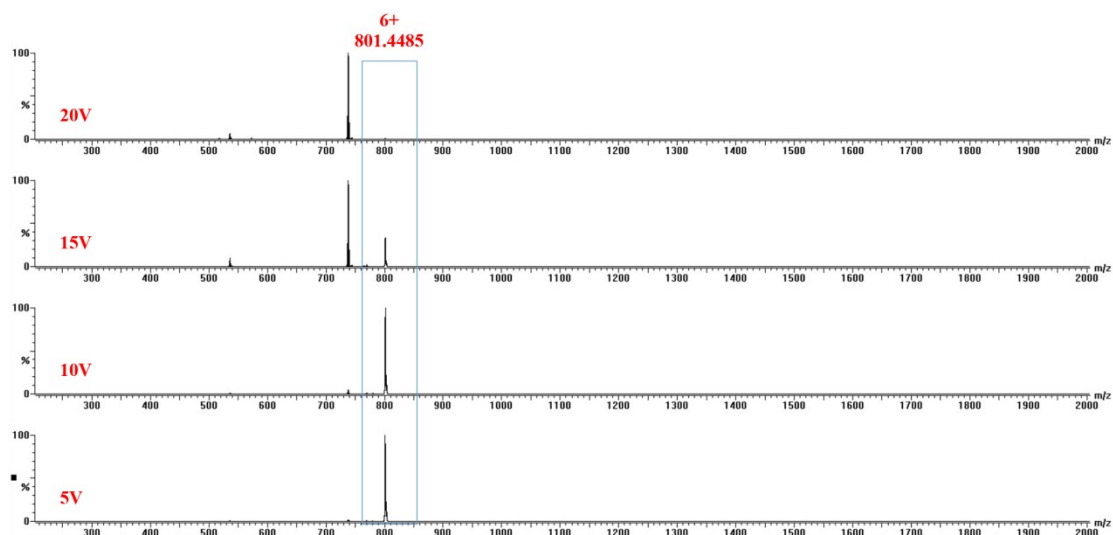

Figure S31. gMS2 of S2 at m/z 801.4485 (6+) with different collision energies.

## 5. Photocatalytic degradation of Rhodamine B

To investigate the photocatalytic degradation efficiency of supramolecular architectures **S1** and **S2** toward Rhodamine B (Rh B), stock solutions were prepared as follows: **S1** and **S2** were dissolved in acetonitrile to a concentration of  $4 \times 10^{-5}$  M, and RhB was dissolved in acetonitrile to  $4 \times 10^{-4}$  M. Five 5 mL glass vials were used. Three vials received 2.5 mL of the Rh B solution; among these, to one vial, 0.1 mL of acetonitrile was added as a blank control, while to the other two vials, 0.1 mL of the above-prepared **S1** and **S2** solutions were added, respectively. The remaining two vials contained 0.1 mL of **S1** or **S2** solution diluted with 2.5 mL of acetonitrile, serving as catalyst-only controls.

All samples were placed in a multi-channel photocatalytic reactor and irradiated with white light ( $250 \text{ mW/cm}^2$ ) for 0–10 minutes. UV-Vis absorption spectra were recorded at 1-minute intervals. The degradation efficiency ( $\eta$ ) was calculated using the equation:  $\eta = (A_0 - A) / A_0 \times 100\%$ , where  $A_0$  and  $A$  represent the initial and time-dependent absorbance of RhB at 554 nm, respectively.

Under light irradiation, Rh B alone exhibited approximately 30% self-degradation (Figure S29). In contrast, in the presence of **S1** and **S2**, the degradation efficiencies reached 82.5% and 84.9% within 10 minutes, respectively, demonstrating the remarkable photocatalytic activity of these iridium-based metallo-organic triangles (Figures S30-31). In the control experiments containing only the supramolecules (without Rh B), negligible changes in UV-Vis absorption were observed after light irradiation, suggesting that both **S1** and **S2** are photostable under the experimental conditions (Figure S32-33).

To compare the degradation efficiencies of ligands and supramolecular systems, ligands L1 and L2 were used to investigate the degradation of Rhodamine B under the same illumination conditions and using the same method described above. In the presence of L1 and L2, the degradation efficiencies within 10 minutes were 70.0% and 70.6%, respectively (Figs. S39 – S40).

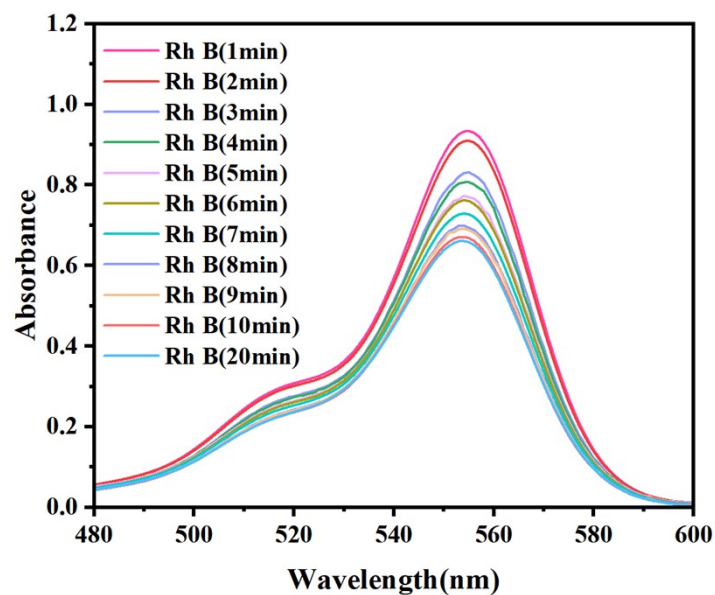

Figure S32: Time-dependent absorbance change of Rhodamine B without catalyst irradiating with white light ( $250 \text{ mW/cm}^2$ ).

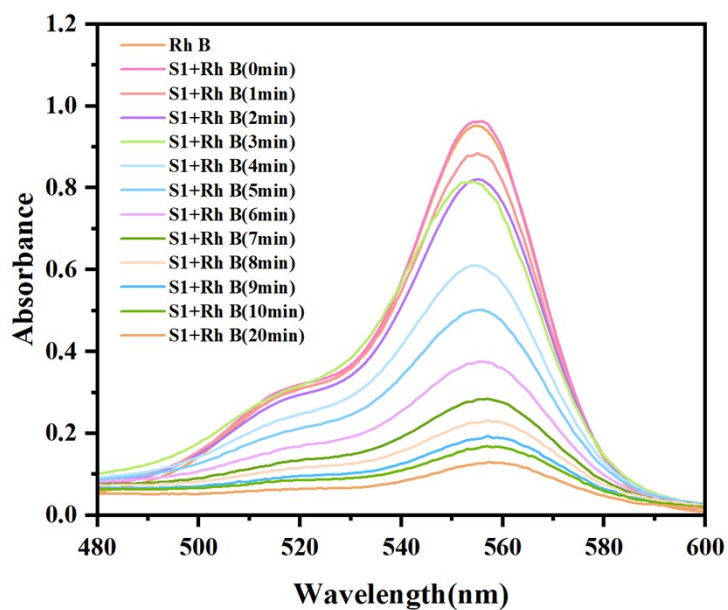

Figure S33: Time-dependent changes in the absorbance of Rhodamine B in the presence of S1 irradiating with white light ( $250 \text{ mW/cm}^2$ ).

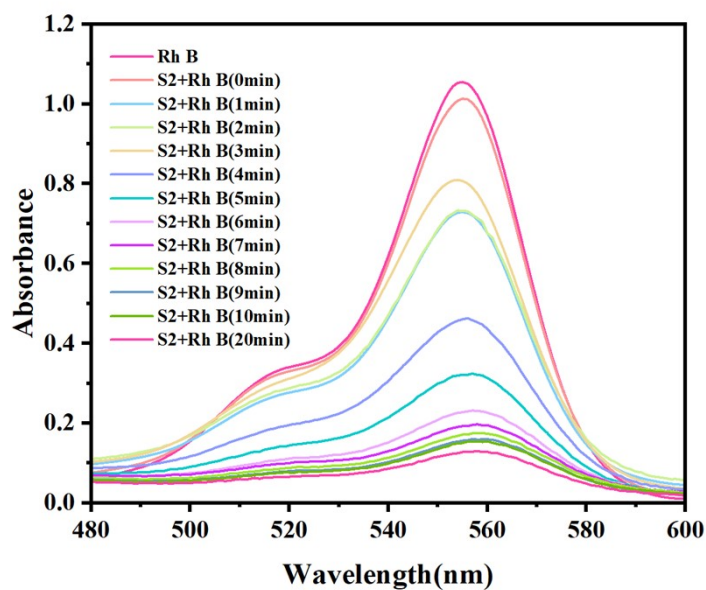

Figure S34: Time-dependent changes in the absorbance of Rhodamine B in the presence of S2 irradiating with white light (250 mW/cm<sup>2</sup>).

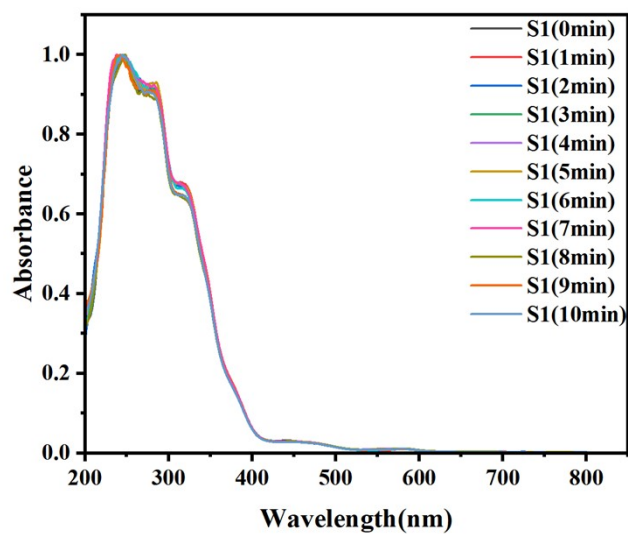

Figure S35: Time-dependent absorbance change of supramolecule S1 irradiating with white light (250 mW/cm<sup>2</sup>).

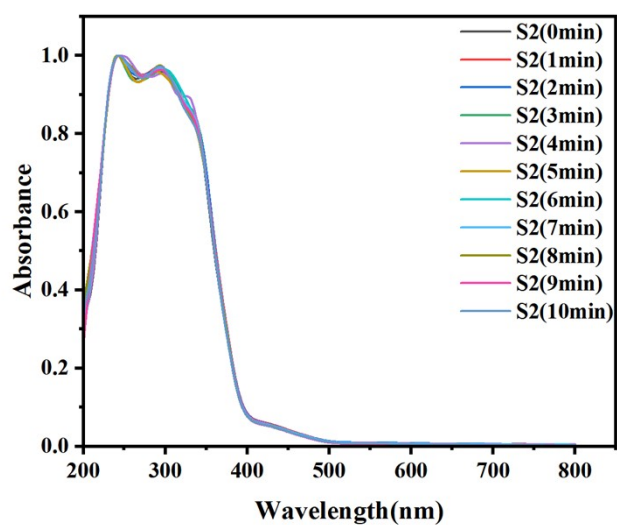

Figure S36: Time-dependent absorbance change of supramolecule **S2** irradiating with white light (250 mW/cm<sup>2</sup>).

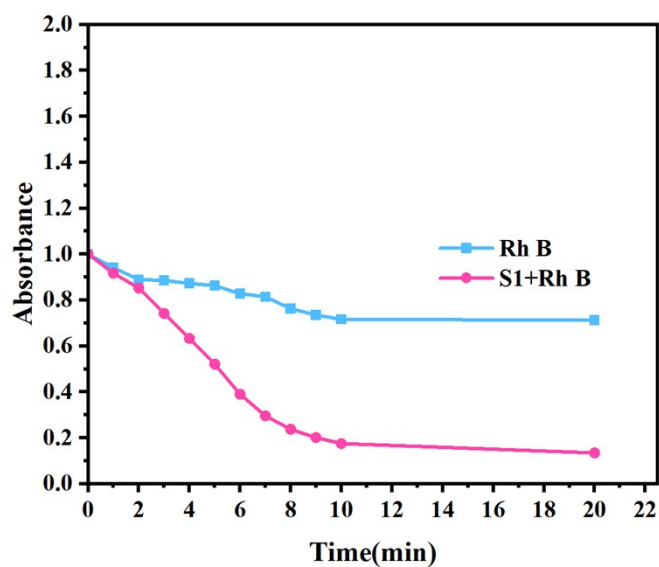

Figure S37: Time-dependent changes in the normalized UV-Vis absorbance of Rhodamine B at 554 nm in the absence (blue line) and presence of **S1** (pink line).

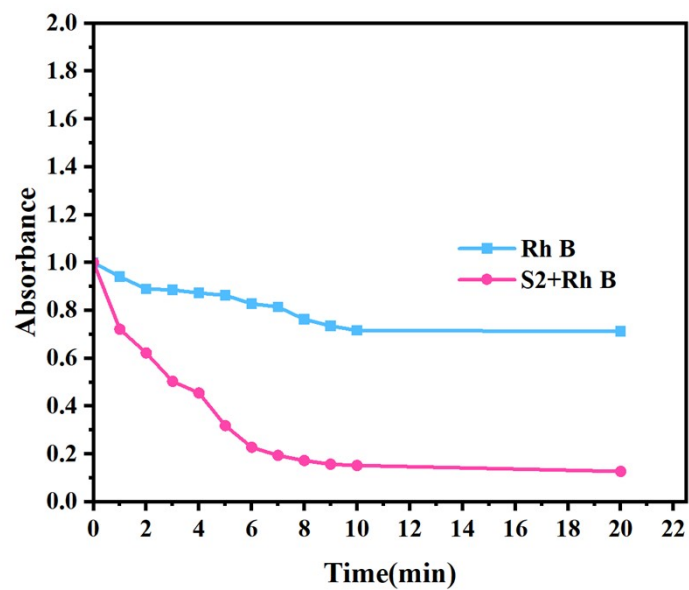

Figure S38: Time-dependent changes in the normalized UV-Vis absorbance of Rhodamine B at 554 nm in the absence (blue line) and presence of S2 (pink line).

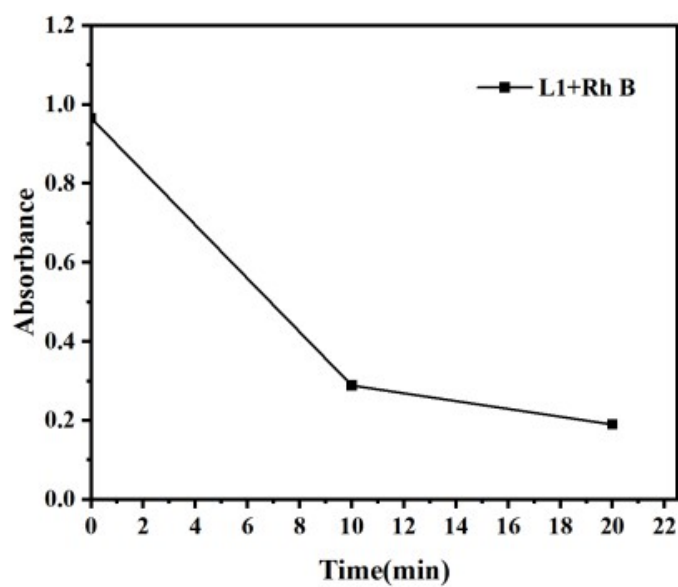

Figure S39: The variation of the ultraviolet-visible absorbance of Rhodamine B at 554 nm with time in the presence of L1.

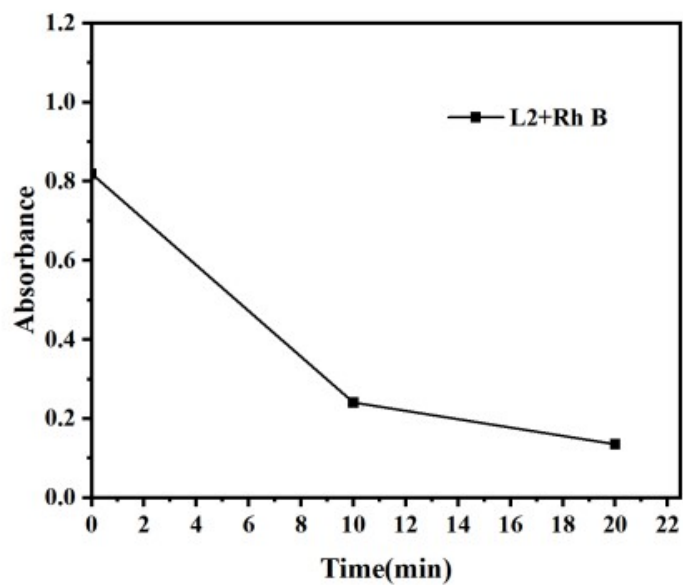

Figure S40: The variation of the ultraviolet-visible absorbance of Rhodamine B at 554 nm with time in the presence of L2.

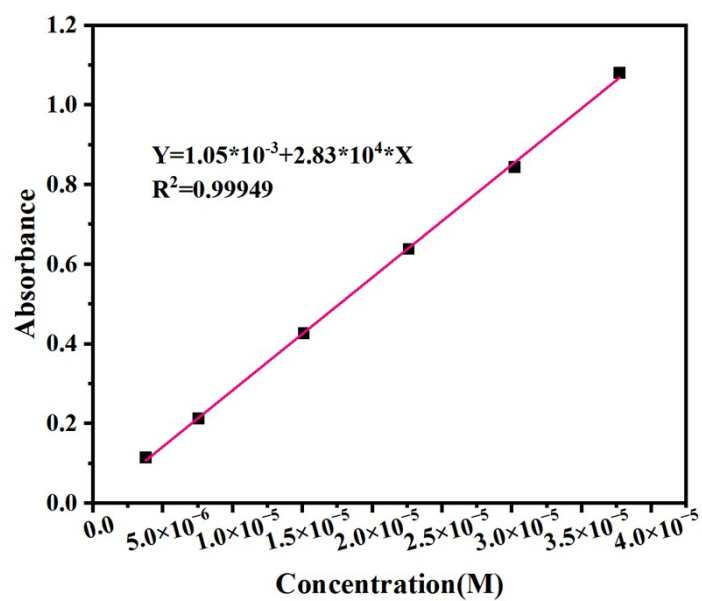

Figure S41: Standard curves of Rhodamine B versus the absorbance.

Table S1 Comparison with reported photodegradation of rh b photocatalysts.

| System                                                                                         | Degradation efficiency                              | Ref. |
|------------------------------------------------------------------------------------------------|-----------------------------------------------------|------|
| Copper-doped zinc oxide nanoparticles                                                          | 100% degradation efficiency within 120 minutes      | 2    |
| Zinc-based metal-organic framework material [Zn(bdc)(bpb)] <sub>n</sub>                        | 94.3% degradation efficiency within 45 minutes      | 3    |
| Z-type heterojunction photocatalyst C-TiO <sub>2</sub> /g-C <sub>3</sub> N <sub>5</sub> (CTCN) | 96.6% degradation efficiency within 90 minutes      | 4    |
| Vanadium-titanium magnetite tailings/quartz sand composite material                            | 98% degradation rate within 20 minutes              | 5    |
| CdS QDs@ZnO/ZnCr-CO <sub>3</sub> -LDH                                                          | Degradation efficiency of 98.26% within 180 minutes | 6    |
| a nitrogen-doped porous carbon-supported Co-Fe-NC(4:2) catalyst added to PMS                   | 100% degradation efficiency within 6 minutes        | 7    |
| MMT-supported TiO <sub>2</sub> nanotubes                                                       | 90% degradation efficiency within 210 minutes       | 8    |

## 6. References

1. S. Sprouse, K. A. King, P. J. Spellane and R. J. Watts, *J. Am. Chem. Soc.*, 1984, **106**, 6647–6653.
2. G. Chen, M. Yang, B. Tian, J. Yao, S. Chen, D. Li and G. Yuan, *Sci. Rep.*, 2025, **15**, 18246.

3. X. Li, M. Zhang, Y. Yan, H. Sun, M. La, Y. Hu, Q. Jia, Z. Ding, J. Su, C. Chen, Y. Han and S. Ma, *Dalton Trans.*, 2025, **51**, 5151–5163.
4. M. X. Tian, Y. M. Yan, Y. Zhang, T. Y. Cui, G. Y. Zhang, J. B. Zhao, Y. Y. Yang and J. H. Jiang, *Inorg. Chem. Commun.*, 2023, **158**.
5. Y. Liu, C. Liao, L. Liu, X. Zhu, Z. Chen, D. Ren, T. Yang and Y. Sun, *Miner. Eng.*, 2024, **219**, 109083.
6. N. M. Abdelbar, M. A. Ahmed and A. A. Mohamed, *Opt. Mater.*, 2024, **155**, 115802.
7. D. P. Jaihindh, S.-B. Lu, T.-T. Chang, Y.-F. Lin, K. Shukla, T.-F. M. Chang, M. Sone and C.-Y. Chen, *ACS Appl. Nano Mater.*, 2025, **8**, 17154–17164.
8. T. B. T. Dao, T. T. L. Ha, T. D. Nguyen, H. N. Le, C. N. Ha-Thuc, T. M. L. Nguyen, P. Perre and D. M. Nguyen, *Chemosphere*, 2021, **280**, 130802.
